# The Epithelial and Stromal Immune Microenvironment in Gastric Cancer: A Comprehensive Analysis Reveals Prognostic Factors with Digital Cytometry

Wenjun Shen<sup>1,2,3,\*</sup>, Guoyun Wang<sup>1</sup>, Georgia R. Cooper<sup>4</sup>, Yuming Jiang<sup>5,\*</sup>, and Xin Zhou<sup>4,6</sup>

<sup>1</sup>Department of Bioinformatics, Shantou University Medical College, Shantou, Guangdong, China

<sup>2</sup>Stanford Center for Biomedical Informatics Research (BMIR), Department of Medicine, Stanford University, Stanford, CA, USA

<sup>3</sup>Guangdong Provincial Key Laboratory of Infectious Diseases and Molecular Immunopathology, Shantou, Guangdong, China

<sup>4</sup>Department of Biomedical Engineering, Vanderbilt University, Nashville, TN 37235, USA

<sup>5</sup>Department of Radiation Oncology, Stanford University School of Medicine, Stanford, CA, USA

<sup>6</sup>Department of Computer Science, Vanderbilt University, Nashville, TN 37235, USA

\*Corresponding author: [wjshen@stu.edu.cn](mailto:wjshen@stu.edu.cn), [ymjiang@stanford.edu](mailto:ymjiang@stanford.edu)

## Abstract

**Background:** Gastric cancer (GC) is the third leading cause of cancer-related deaths worldwide. Tumor heterogeneity continues to confound researchers' understanding of tumor growth and the development of an effective therapy. Digital cytometry allows interpretation of heterogeneous bulk tissue transcriptomes at the cellular level.

**Methods:** We built a novel signature matrix to dissect epithelium and stroma signals using a scRNA-seq data set for GC. We applied cell mixture deconvolution to estimate diverse epithelial, stromal,

8 and immune cell proportions from bulk transcriptome data in four independent GC cohorts. Robust  
9 computational methods were applied to identify strong prognostic factors for GC.

10 **Results:** We identified an EMEC population whose proportions were significantly higher in patients  
11 with stage I cancer than other stages, and it was predominantly present in tumor samples but not  
12 typically found in normal samples. We found that the ratio of EMECs to stromal cells and the ratio  
13 of adaptive T cells to monocytes were the most significant prognostic factors within the non-immune  
14 and immune factors, respectively. The STEM score, which unifies these two prognostic factors was an  
15 independent prognostic factor of overall survival (HR=0.92, 95% CI=0.89-0.94,  $p = 2.05 \times 10^{-9}$ ). The  
16 entire GC cohort was stratified into three risk groups (high-, moderate-, and low-risk) which yielded  
17 incremental survival times ( $p < 0.0001$ ). For stage III disease, patients in the moderate- and low-  
18 risk groups experienced better survival benefits from radiation therapy ((HR=0.16, 95% CI=0.06-0.4,  
19  $p < 0.0001$ ), whereas those in the high-risk group did not (HR=0.49, 95% CI=0.14-1.72,  $p = 0.25$ ).

20 **Conclusions:** We conclude that the STEM score is a promising prognostic factor for gastric cancer.

## 21 1 Introduction

22 Gastric cancer (GC) is a complex and heterogeneous disease from morphological, molecular, and cellular  
23 standpoints [1]. Such tumor heterogeneity has been demonstrated in numerous histological and molecular  
24 classifications. The Lauren classification separates gastric adenocarcinomas into intestinal, diffuse, and mixed  
25 subtypes which were found to be associated with varying stomach cancer risks [2, 3]. The Asian Cancer  
26 Research Group (ACRG) classified GC into four molecular subtypes that, based on gene expression data,  
27 were associated with distinct molecular alterations, disease progression, and survival outcomes [4]. These  
28 subtypes are epithelial-to-mesenchymal transition (EMT), MSS/TP53-, MSS/TP53+, and microsatellite  
29 instability (MSI). More recently, The Cancer Genome Atlas (TCGA) research network characterized GC into  
30 four genomic subtypes by integrating data from six molecular platforms: array-based somatic copy number  
31 analysis, whole-exome sequencing, array-based DNA methylation profiling, messenger RNA sequencing,  
32 microRNA (miRNA) sequencing and reverse-phase protein array, as well as Microsatellite instability (MSI)  
33 testing [5]. These genomic subtypes are EBV-positivity (EBV), MSI-high status (MSI), genomically stable  
34 (GS), and those exhibiting chromosomal instability (CIN). Each subtype displays distinct molecular and  
35 genomic patterns.

36 Tumor heterogeneity, including the results from the tumor microenvironment (TME), continues to con-  
37 found researchers' understanding of tumor growth and the development of an effective therapy [6, 7]. Tumors

38 are complex ecosystems that are affected by numerous stromal and immune factors which dampen or en-  
39 hance the effects of genetic epithelial alterations [8–11]. The TME is comprised of tumor cells, tumor  
40 stromal cells, endothelial cells, immune cells, and the non-cellular components of extracellular matrix pro-  
41 teins [12,13]. Some essential components of the TME, including cancer-associated fibroblasts (CAF) [14,15],  
42 tumor-infiltrating lymphocytes (TIL) [16,17], tumor-associated macrophages (TAM) [18], and other cellular  
43 components [19–21], have been evaluated to help researchers better understand the role of the TME in gastric  
44 cancer risk. Most of these studies have focused on the subsets of cellular components of TME: typically the  
45 stromal and immune cell populations. However, the prognostic values of diverse gastric epithelial cell types  
46 in GC risk were still unclear. To our knowledge, a systematic analysis of the prognostic value of diverse  
47 epithelial cell types, including cancer cell, MSC, PMC and PC, emerged in early gastric cancer for predicting  
48 survival has not been described.

49 Digital cytometry enables the examination of heterogenous bulk tissue transcriptomes at the cellular level  
50 in addition to using computational methods to quantify cell type composition. In recent years, single cell  
51 RNA-sequencing (scRNA-seq) techniques have offered new insights into tissue samples at the resolution of  
52 single cells. The availability of single cell transcriptomic profiles, which are used to build cell type-specific  
53 signature matrices, promote the development of statistical deconvolution methods for estimating cell type  
54 compositions in heterogeneous mixture samples. [22,23].

55 This study attempts to investigate the TME of GC with comprehensive epithelial, stromal, and immune  
56 cell profiling by combining single cell and bulk expression profiles. We have undertaken a comprehensive  
57 analysis on 10 non-immune and 7 immune cell populations of the TME of GC, evaluated the prognostic role  
58 of the STEM score in four independent GC cohorts, and stratified the GC patients into three TME subtypes  
59 based on the abundance of four STEM populations.

## 60 **2 Results**

### 61 **2.1 Building a non-immune signature matrix for GC from a single-cell RNA-seq** 62 **data set**

63 We carried out a systematic cell subtype analysis on a single-cell RNA-seq data set of patients with gastric  
64 premalignant lesions and early gastric cancer [24]. An unsupervised hierarchical clustering analysis was used  
65 to investigate the possibility of identifying different non-immune cell populations in the gastric scRNA-seq

66 data set based on their expression profiles. Hierarchical clustering of the cell types in the cascade stages from  
67 non-atrophic gastritis (NAG), chronic atrophic gastritis (CAG), intestinal metaplasia (IM) and early gastric  
68 cancer (EGC) in the single cell reference revealed that 24,874 non-immune cells fell into three large groups:  
69 epithelial cell types (including cancer cell, enterocyte, enteroendocrine, GMC, goblet cell, MSC, PC, and  
70 PMC), stromal cell types (including Fibroblast and SM cells), and endothelial cell types (Fig.1). Notably, the  
71 enterocytes and cancer cells that emerged in the CAG and IM biopsies were clustered together. We labeled  
72 this cluster as the premalignant epithelial cell (PMEC) population. We also detected a cell population in  
73 which cells were clustered by stage instead of by cell type. This cell population consists of four gastric  
74 epithelial cell types (including cancer cell, MSC, PC, and PMC) that emerged uniformly in the EGC biopsy.  
75 Therefore, we called it the early malignant epithelial cell (EMEC) subtype. The other eight cell populations  
76 were found to clustered by cell type. Overall, ten cell populations of EMEC, PMEC, enteroendocrine, GMC,  
77 goblet cell, MSC, PC, PMC, endothelial cell, and stromal cell were detected in the cluster tree (Fig.1, Table  
78 5). To estimate the proportions of non-immune cell compositions in the gastric cancer samples, we created a  
79 cell population-specific signature matrix to distinguish these 10 cell populations. The cell population-specific  
80 marker genes were selected by using two-way ANOVA (see Methods for details).

## 81 **2.2 Dissecting epithelium-stroma-immune signals from gastric cancer samples**

82 Epithelial, stromal, and immune cell populations comprise the vast majority of gastric tumor cellularity. In  
83 order to accurately dissect epithelium-stroma-immune signals from GC samples, we applied CIBERSORT [25]  
84 or CIBERSORTx [23] to RNA profiles of GC samples. Our methodology involved two separate deconvolution  
85 procedures: an immune cell deconvolution procedure and a non-immune cell deconvolution procedure, which  
86 dissects immune and non-immune signals from GC samples, respectively. The immune system is an important  
87 determinant of the TME, we applied CIBERSORT/CIBERSORTx to infer relative immune cell subtype  
88 fractions in four cohorts of bulk GC samples by using a signature matrix derived from the peripheral blood  
89 mononuclear cell (PBMC) samples (Fig.2, see Methods for details). We observed that the T adaptive cell  
90 population, comprised of naive and memory CD4 and CD8 T cells, was consistently dominant across the four  
91 GC cohorts, followed by the monocyte, B adaptive, and T innate subsets. The single cell gene expression  
92 data sets of GC offer new insights to investigating the GC TME at the resolution of single cells. To enumerate  
93 GC non-immune cell proportions, we further applied CIBERSORT/CIBERSORTx by using the single-cell  
94 reference profiles to distinguish epithelial, stromal, and endothelial cell subsets in the bulk GC samples

Figure 1: Cluster tree of 11 non-immune cell types of patients with NAG, CAG, IM and EGC.

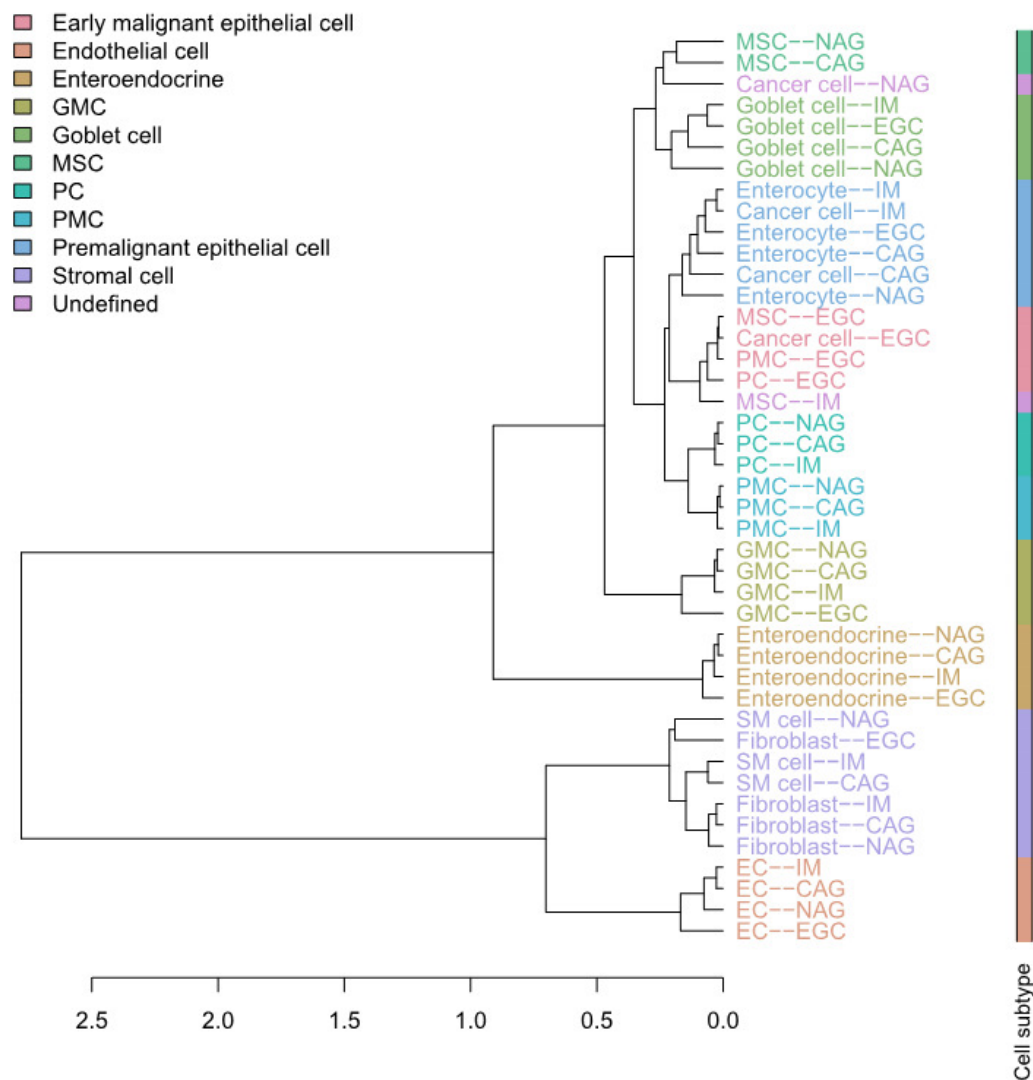

95 (Fig.3, see Methods for details). We observed that the EMEC, PC, and stromal cell subsets were highly  
96 abundant while the endothelial cell subset was less abundant in all four cohorts.

Figure 2: The relative abundance of major classes of immune cell populations for four cohorts of gastric cancer samples.

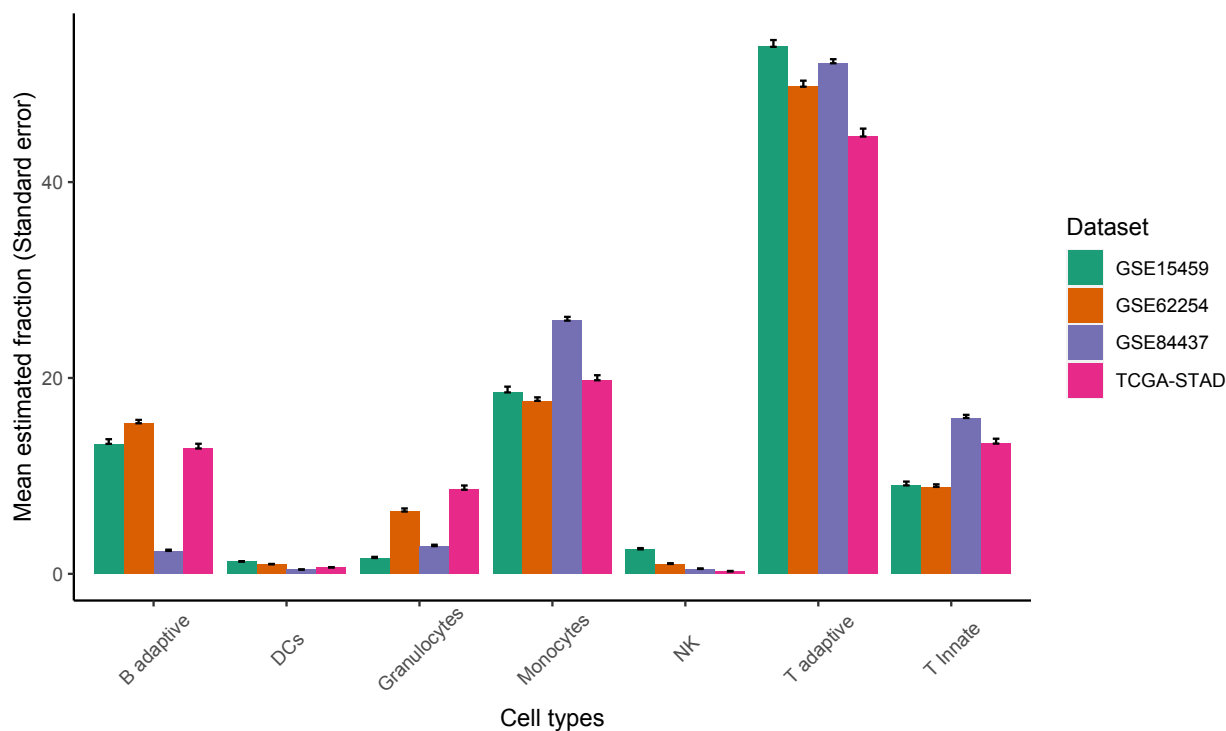

97 The EMEC population is composed of gastric epithelial cells (including cancer cells, MSCs, PCs, and  
98 PMCs) that were isolated from early GC patients. We analyzed the functional annotation of the EMEC  
99 gene signatures using Gene Ontology (GO). The EMEC gene signatures were mostly enriched for mitochon-  
100 drial translation, mitochondrial translational elongation and mitochondrial translational termination in the  
101 biological process (BP) ontology (Fig. 4a); and were mainly enriched in the mitochondrial inner membrane  
102 and mitochondrial ribosome in the cellular component (CC) ontology (Fig. 4b). The results suggest that the  
103 mitochondria could serve as a GC biomarker for early detection, which are consistent with previous reports  
104 showing a role for mitochondria [26–28] in the early detection of solid tumors.

105 We hypothesized that the EMEC population would be more abundant in patients with stage I cancer than  
106 other stages. To test this hypothesis, we estimated proportions of the EMEC population in each sample of  
107 both the ACRG and TCGA-STAD cohorts. We observed significantly higher EMEC populations in patients

Figure 3: The relative abundance of major classes of non-immune cell populations for four cohorts of gastric cancer samples.

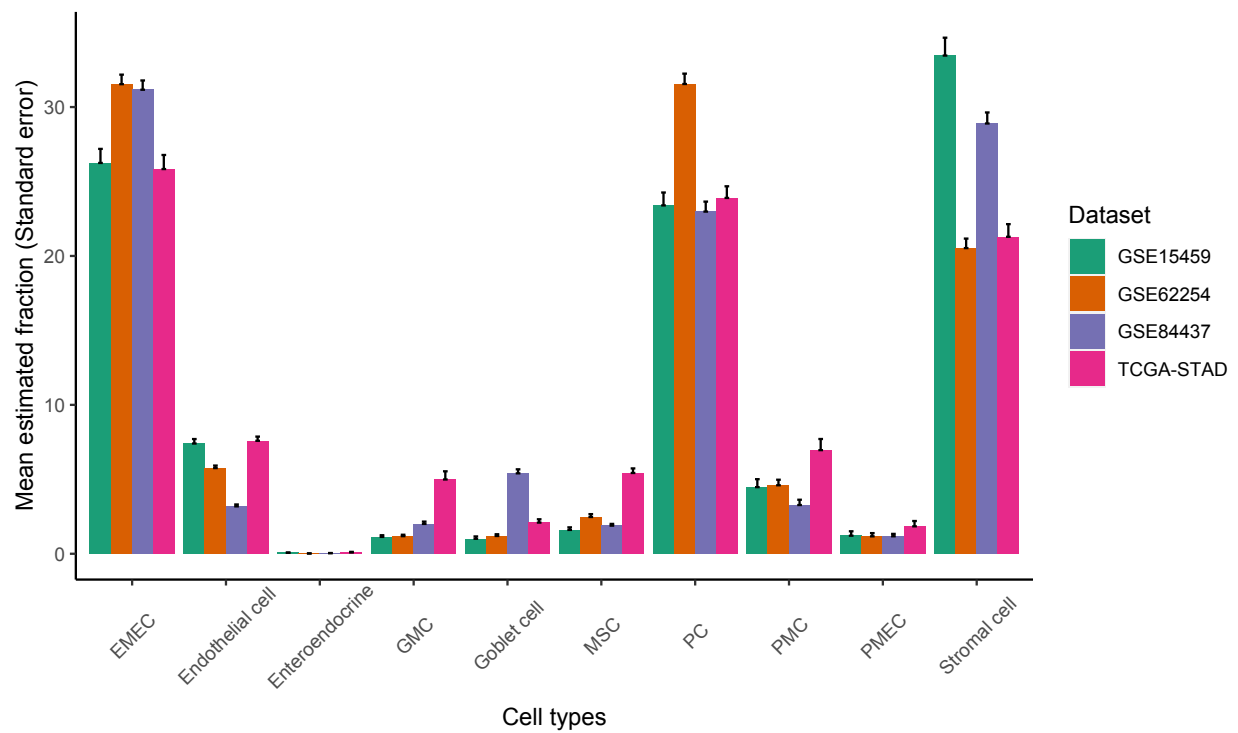

Figure 4: Top GO terms enriched for the EMEC gene signatures in the BP (a) and CC (b) ontologies.

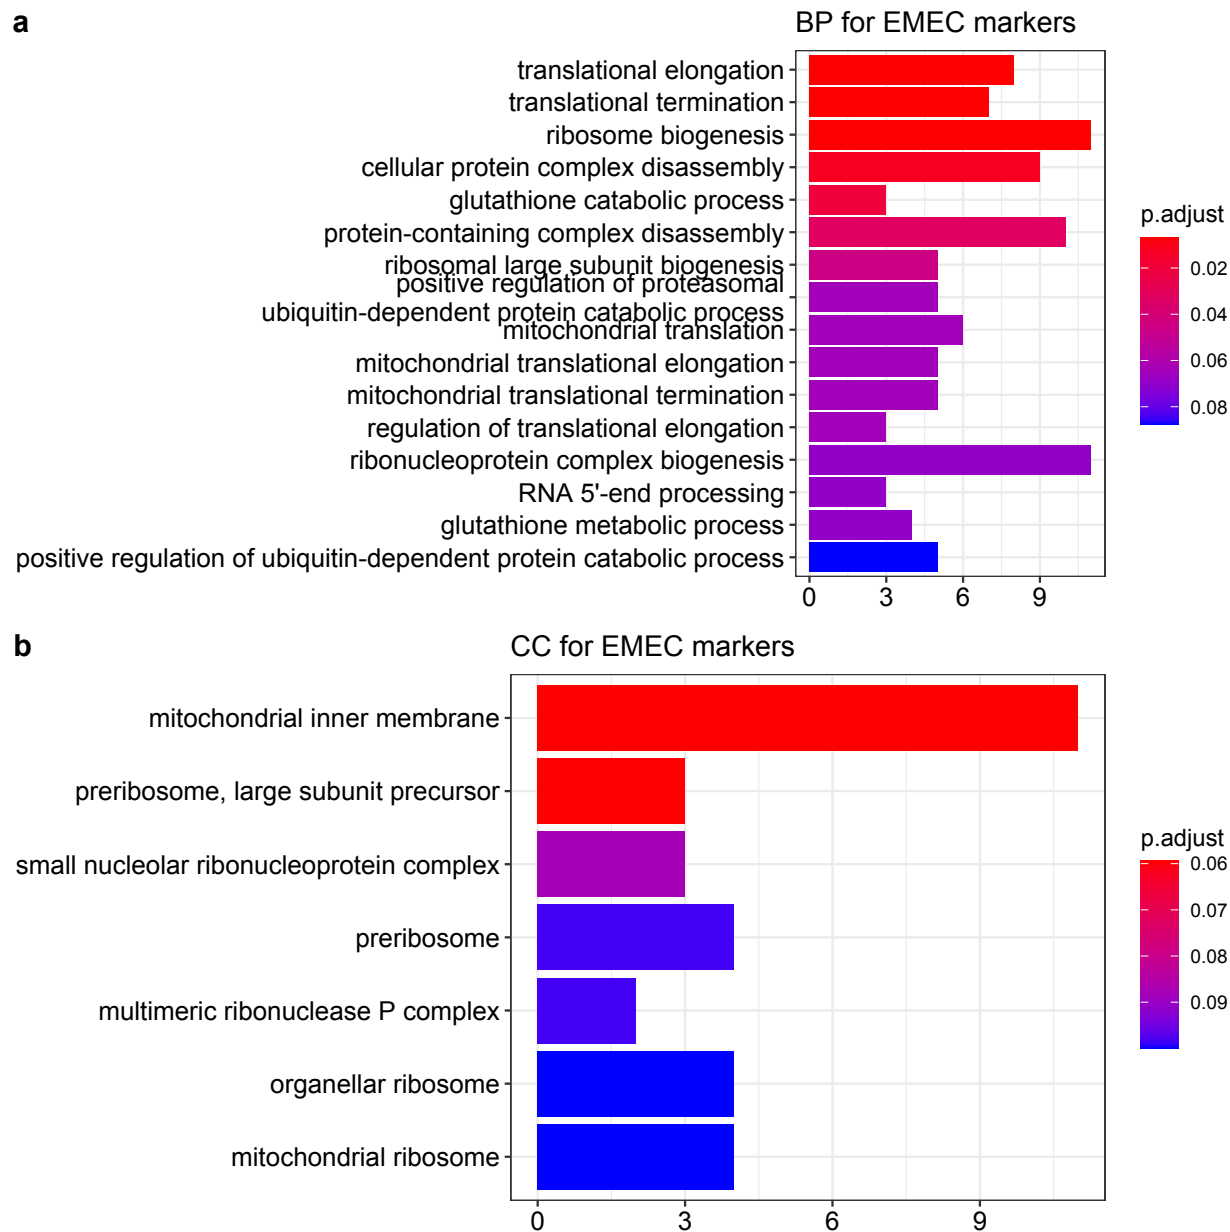



108 with stage I cancer than stage II, III, or IV in both the ACRG and TCGA-STAD cohorts ( $p < 0.05$ , Student's  
109 t-test; Fig.5). To investigate whether the EMEC population was typically found in tumor samples but not  
110 in normal samples, we estimated proportions of 10 non-immune cell populations in samples from both tumor  
111 and adjacent normal tissues available in the TCGA-STAD sample collection. We observed that the EMEC  
112 population was significantly higher in tumor samples than in adjacent normal samples ( $p < 0.0001$ , Student's  
113 t-test; Fig.6).

114 We also observed the PMEC population was significantly lower in tumor samples than in normal samples  
115 ( $p < 0.0001$ , Student's t-test; Fig.6). The proliferative cell type was the second major epithelial cell type  
116 found in tumors. It was significantly increased in tumor samples when compared to normal samples ( $p <$   
117  $0.0001$ , Student's t-test; Fig.6). Contrastingly, the PMC cell types were significantly decreased in tumor  
118 samples compared to normal samples ( $p < 0.0001$ , Student's t-test; Fig.6).

Figure 5: Comparison of the relative abundance of EMEC population across four stages in the ACRG and TCGA cohorts.

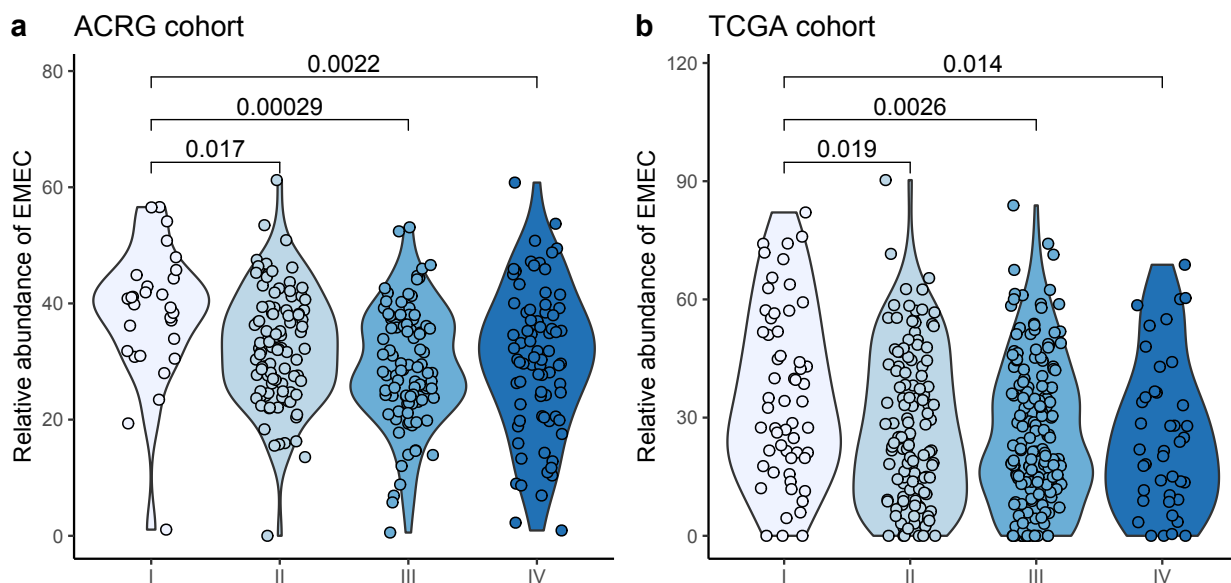

### 119 2.3 Correlates of non-immune/immune factors with overall survival

120 The ACRG (GSE62254) cohort was used as the training cohort because it provided the most comprehensive  
121 clinical data along with more than 5 years of follow-up information for 300 GC patients. The univariate Cox

Figure 6: Comparison of the relative abundance of non-immune cell populations between normal and tumor samples in the TCGA-STAD cohort.

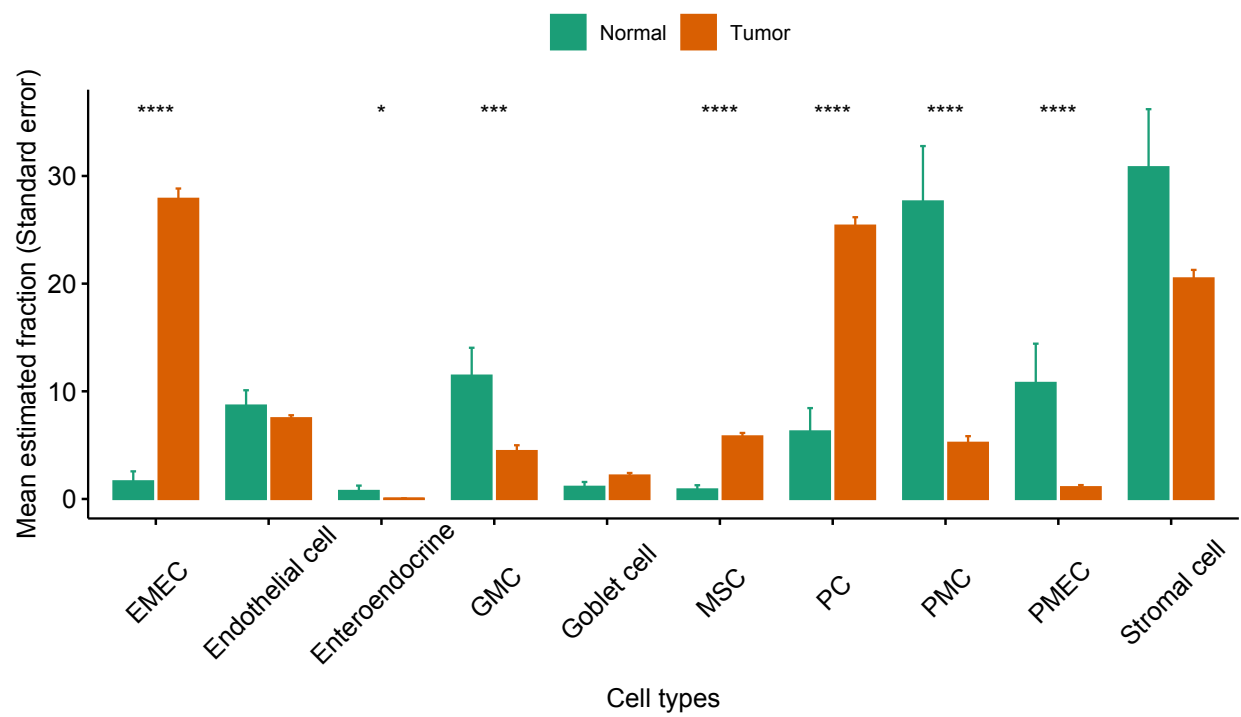

122 proportional hazards regression model was used to identify prognostic factors of overall survival (OS) in the  
 123 training cohort. We further expanded the univariate analyses to Multivariate Cox proportional hazard analy-  
 124 ses, which accounts for age, sex, stage, Lauren histology, and adjuvant chemotherapy treatment as additional  
 125 clinical covariates to examine their independent prognostic values. The univariate Cox analyses indicated  
 126 that the three non-immune factors of EMEC/stromal cell, PC/stromal cell, and endothelial cell/stromal cell  
 127 ratios were significantly correlated to OS, and the hazard ratio ranged from 0.27 to 0.8 ( $p < 0.05$ ). Addition-  
 128 ally, the ratios of EMEC/stromal cell and PC/stromal cell remained significant prognostic factors of OS by  
 129 multivariate analyses, with hazard ratios of 0.82 and 0.85 ( $p < 0.05$ ), respectively (Table 1). The univariate  
 130 Cox regression analysis for the prediction of OS also confirmed that three immune factors - the ratios of T  
 131 adaptive/monocytes, monocytes/T adaptive, and monocytes/B adaptive were all found to be of prognostic  
 132 significant factors with a hazard ratio ranging from 0.86 to 2.54 ( $p < 0.05$ ). The multivariate analyses  
 133 confirmed that the T adaptive/monocytes and monocytes/T adaptive ratios were independent prognostic  
 134 factors of OS with hazard ratios of 0.88 and 2.61 ( $p < 0.05$ ), respectively (Table 2).

Table 1: Univariate and multivariate results in Cox proportional hazards analysis of non-immune factors in the training cohort.

| Non-immune factors            | Univariate analysis |         | Multivariate analysis |         |
|-------------------------------|---------------------|---------|-----------------------|---------|
|                               | HR (95% CI for HR)  | P value | HR (95% CI for HR)    | P value |
| EMEC/Stromal cell             | 0.75 (0.65-0.86)    | < 0.001 | 0.82 (0.71-0.94)      | 0.005   |
| PC/Stromal cell               | 0.8 (0.71-0.9)      | < 0.001 | 0.85 (0.75-0.96)      | 0.011   |
| Endothelial cell/Stromal cell | 0.27 (0.08-0.9)     | 0.032   | 0.44 (0.13-1.47)      | 0.182   |
| Stromal cell/Endothelial cell | 1.04 (1-1.08)       | 0.081   | 1.07 (1.02-1.13)      | 0.009   |
| PC/Endothelial cell           | 0.98 (0.96-1.01)    | 0.15    | 0.99 (0.97-1.02)      | 0.463   |
| EMEC/Endothelial cell         | 0.99 (0.97-1.01)    | 0.167   | 0.99 (0.97-1.01)      | 0.415   |

Note: The p value was derived from the Cox regression model; HR, hazard ratio; CI, confidence interval.

Table 2: Univariate and multivariate results in Cox proportional hazards analysis of immune factors in the training cohort.

| Immune factors          | Univariate analysis |         | Multivariate analysis |         |
|-------------------------|---------------------|---------|-----------------------|---------|
|                         | HR (95% CI for HR)  | P value | HR (95% CI for HR)    | P value |
| T adaptive/Monocytes    | 0.86 (0.78-0.96)    | 0.004   | 0.88 (0.8-0.97)       | 0.01    |
| Monocytes/T adaptive    | 2.54 (1.24-5.21)    | 0.011   | 2.61 (1.11-6.15)      | 0.028   |
| Monocytes/B adaptive    | 1.14 (1-1.29)       | 0.048   | 1.08 (0.95-1.22)      | 0.239   |
| B adaptive/Monocytes    | 0.8 (0.61-1.04)     | 0.097   | 0.78 (0.59-1.03)      | 0.078   |
| T Innate/T adaptive     | 2.76 (0.81-9.39)    | 0.104   | 1.6 (0.41-6.21)       | 0.5     |
| Granulocytes/Monocytes  | 0.79 (0.5-1.24)     | 0.304   | 0.9 (0.63-1.29)       | 0.582   |
| B adaptive/T Innate     | 0.99 (0.96-1.02)    | 0.347   | 0.99 (0.97-1.01)      | 0.354   |
| T Innate/B adaptive     | 1.16 (0.85-1.59)    | 0.36    | 1 (0.72-1.37)         | 0.978   |
| B adaptive/T adaptive   | 1.44 (0.61-3.43)    | 0.405   | 1.43 (0.54-3.78)      | 0.471   |
| Granulocytes/B adaptive | 0.87 (0.63-1.22)    | 0.426   | 1.05 (0.76-1.45)      | 0.781   |
| Granulocytes/T Innate   | 0.96 (0.86-1.09)    | 0.553   | 1 (0.99-1.01)         | 0.997   |
| T Innate/Monocytes      | 0.89 (0.57-1.38)    | 0.598   | 0.82 (0.52-1.3)       | 0.393   |
| T adaptive/B adaptive   | 0.99 (0.93-1.05)    | 0.742   | 0.99 (0.93-1.06)      | 0.817   |
| Granulocytes/T adaptive | 0.85 (0.32-2.29)    | 0.749   | 1.17 (0.46-2.98)      | 0.741   |

Thus, we defined a new TME score, called STEM score for each GC sample by combining the most significant non-immune ( the ratio of EMECs to Stromal cells) and immune factors (the ratio of adaptive T

cells to Monocytes) as:

$$\text{STEM score} = \frac{\text{EMEC}}{\text{Stromal cell}} + \frac{\text{T adaptive}}{\text{Monocytes}}$$

135 We performed multivariate Cox regression analysis correcting for clinicopathological variables, including  
136 age, sex, stage, Lauren histology, and adjuvant chemotherapy treatment. We found that the STEM score  
137 acts as an independent prognostic factor for OS (HR 0.9,  $p = 0.003$ ) in the training cohort (Table 3).

Table 3: Multivariate Cox regression analysis used to evaluate the independent risk factor of prognosis in the training cohort.

| Variable                                 | HR (95% CI for HR) | P value |
|------------------------------------------|--------------------|---------|
| STEM score                               | 0.9 (0.84-0.97)    | 0.003   |
| Age                                      | 1.02 (1-1.03)      | 0.019   |
| Gender<br>(Male vs. Female)              | 1.21 (0.85-1.71)   | 0.283   |
| Stage<br>(II vs. I)                      | 1.78 (0.68-4.63)   | 0.239   |
| Stage<br>(III vs. I)                     | 3.58 (1.4-9.15)    | 0.008   |
| Stage<br>(IV vs. I)                      | 8.49 (3.36-21.47)  | < 0.001 |
| Lauren<br>(Intestinal vs. Diffuse/Mixed) | 0.75 (0.53-1.07)   | 0.111   |
| Chemotherapy<br>(Yes vs. No)             | 0.45 (0.31-0.64)   | < 0.001 |

138 To validate whether the STEM score had consistent prognostic value in different cohorts, we applied it  
139 to three independent validation data sets from TCGA-STAD, GSE15459, and GSE84437. The multivari-  
140 ate Cox proportional hazard analyses, which account for age, sex, stage, Lauren histology, and adjuvant  
141 chemotherapy/radiation therapy treatment (if applicable as additional clinical covariates) confirmed that  
142 the STEM score was an independent prognostic factor of OS in each validation data set (TCGA-STAD: HR  
143 0.94,  $p = 0.001$ , GSE15459: HR 0.89,  $p = 0.01$ , and GSE84437: HR 0.86,  $p < 0.001$ ). We further performed  
144 a meta-analysis to evaluate the overall effect of the STEM score on clinicopathologic factor-adjusted survival.  
145 We added three validation cohorts to the training cohort. A forest plot of estimated hazard ratios indicated  
146 the STEM score was a significant independent prognostic factor of OS (HR = 0.92,  $p = 2.05 \times 10^{-9}$ , z-test  
147 for overall effect; Fig.7).

## 148 2.4 Increased STEM score associated with superior survival

149 We next assessed the predictive value of the STEM score for risk stratification. For the ACRG cohort, we  
150 stratified 300 patients into two groups (low vs. high) according to the STEM score and using an optimal  
151 cutoff of 3.95 (Fig.8; see Methods for details). The Kaplan-Meier curve showed that patients in the high-  
152 STEM score group had significantly longer OS times than patients in the low-STEM score group ( $p < 0.0001$ ,  
153 log-rank test; Fig.9).

Table 4: Multivariate Cox regression analysis used to examine the independent risk factor of prognosis in three independent validation cohorts.

| Variable                              | TCGA-STAD        |         | GSE15459           |         | GSE84437         |         |
|---------------------------------------|------------------|---------|--------------------|---------|------------------|---------|
|                                       | HR (95% CI)      | P value | HR (95% CI)        | P value | HR (95% CI)      | P value |
| STEM score                            | 0.94 (0.91-0.97) | 0.001   | 0.89 (0.82-0.97)   | 0.010   | 0.86 (0.8-0.92)  | < 0.001 |
| Age                                   | 1.02 (1-1.04)    | 0.011   | 1.01 (1-1.03)      | 0.128   | 1.02 (1.01-1.03) | < 0.001 |
| Gender (Male vs. Female)              | 1.09 (0.76-1.57) | 0.626   | 0.74 (0.47-1.19)   | 0.213   | 1.31 (0.96-1.77) | 0.086   |
| Stage (II vs. I)                      | 1.43 (0.7-2.92)  | 0.321   | 2.22 (0.68-7.22)   | 0.186   |                  |         |
| Stage (III vs. I)                     | 2.64 (1.34-5.21) | 0.005   | 7.96 (2.8-22.61)   | < 0.001 |                  |         |
| Stage (IV vs. I)                      | 4.15 (1.89-9.08) | < 0.001 | 23.28 (7.92-68.46) | < 0.001 |                  |         |
| Lauren (Intestinal vs. Diffuse/Mixed) |                  |         | 1.25 (0.8-1.95)    | 0.322   |                  |         |
| Radiationtherapy (Yes vs. No)         | 0.41 (0.25-0.69) | 0.001   |                    |         |                  |         |

Figure 7: Forest plot of estimated hazard ratios indicating STEM score as a prognostic factor for OS in four GC cohorts.

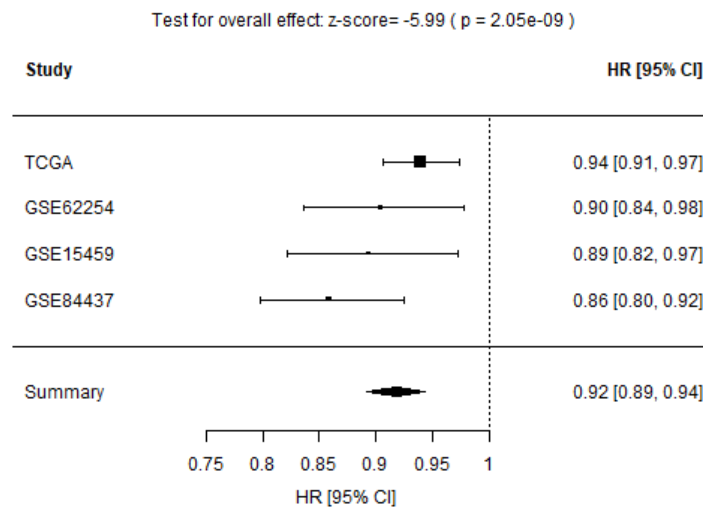

Figure 8: An illustration of optimal cutoff identification for STEM score.

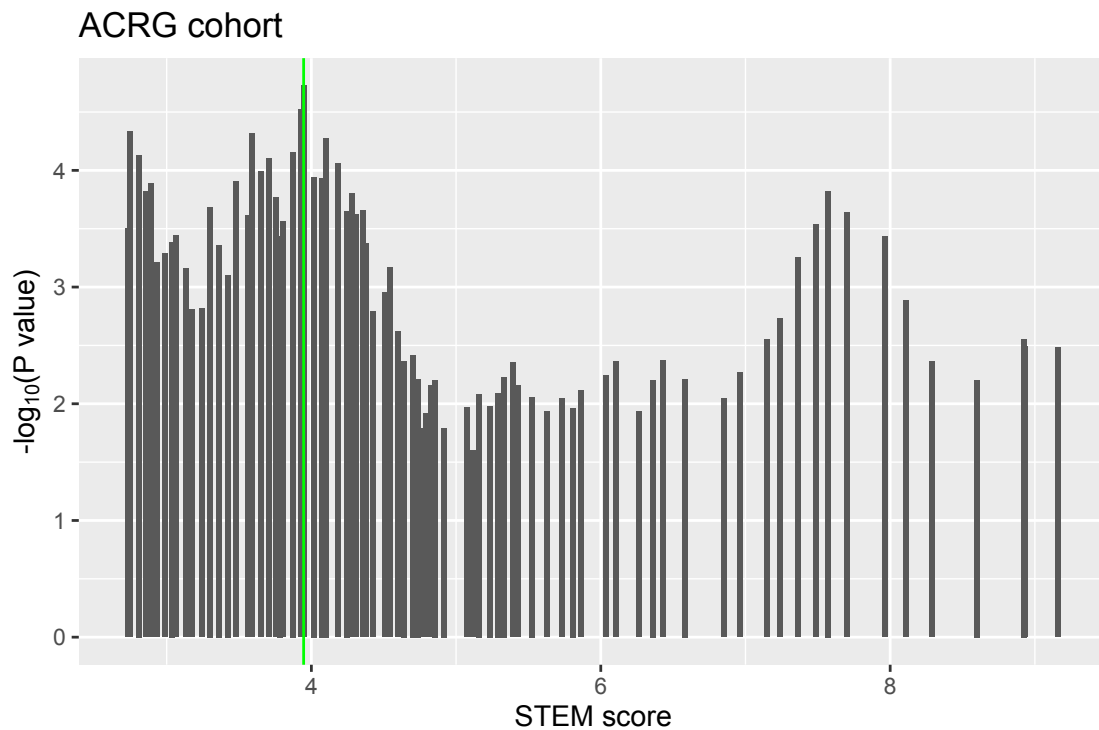

Figure 9: Kaplan-Meier survival curves for the patients with low vs. high STEM scores in the ACRG cohort.

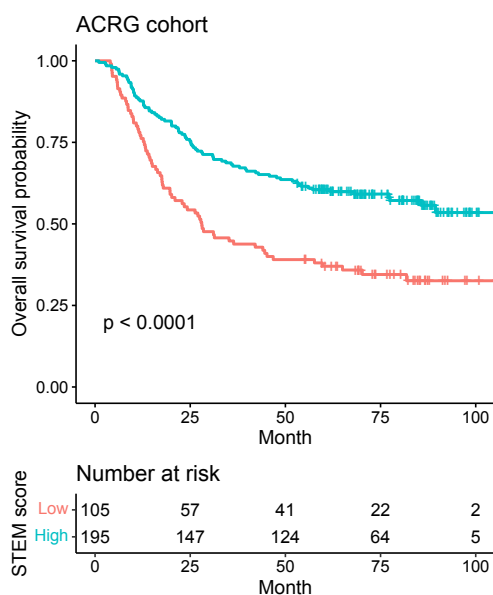

154 By using the same cutoff optimized in the ACRG cohort, we observed consistent results across three  
155 independent validation cohorts that showed patients with a high STEM score yielded better OS than those  
156 with a low STEM score (GSE15459:  $p = 0.015$ ; GSE84437:  $p = 4 \times 10^{-4}$ ; TCGA-STAD:  $p = 1.8 \times 10^{-4}$ ; a  
157 combined set of four cohorts:  $p < 0.0001$ ; log-rank test, Fig.10).

Figure 10: Kaplan-Meier plots for the OS of patients with low vs. high STEM scores in the GSE15459 (a), GSE84437 (b), TCGA-STAD (c) cohorts and a combined set of four cohorts (ACRG, GSE15459, GSE84437, and TCGA-STAD) (d). Significance test  $p$  value is shown in the lower left.

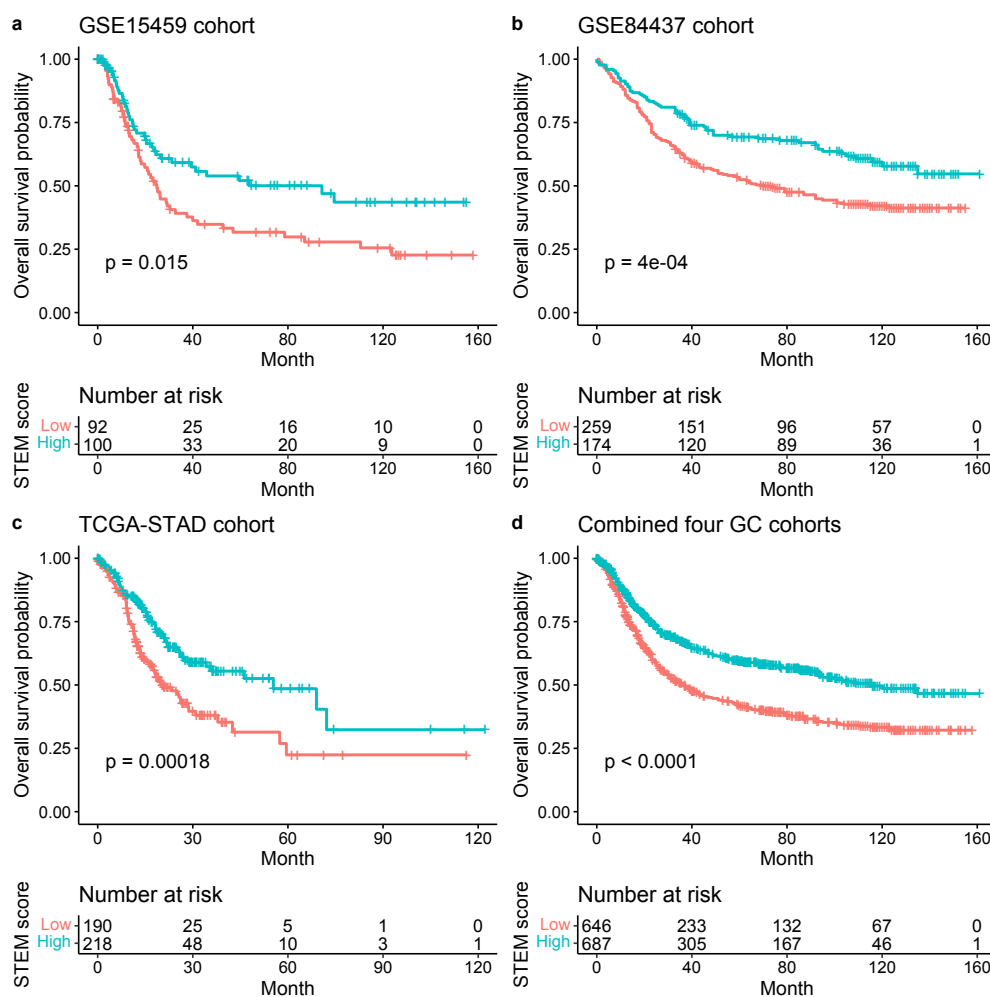

158 Additionally, we investigated the prognostic values of the STEM score in groups of patients treated with  
159 or without chemotherapy. We then stratified the ACRG cohort into four groups based on the STEM score  
160 and chemotherapy (CT) treatment or not. The unadjusted survival curve for the four groups indicated  
161 the high-STEM score groups had superior survival compared to the low-STEM score group for patients  
162 regardless of chemotherapy treatment (Fig.11a).

163 To explore the prognostic values of the STEM score in groups of patients treated with or without radiation  
164 therapy, we stratified the TCGA-STAD cohort into four groups based on the STEM score and radiation  
165 therapy (RT) treatment or not. The unadjusted survival curve for the four groups indicated the high-STEM  
166 score groups still had superior survival compared to the low-STEM score group for patients regardless of  
167 radiation therapy treatment (Fig.11b).

Figure 11: (a) Kaplan-Meier survival curves for the four groups (including chemotherapy-high STEM score, chemotherapy-low STEM score, no chemotherapy-high STEM score, and no chemotherapy-low STEM score) in the ACRG cohort. Significance test p value is shown in the lower left. (b) Kaplan-Meier survival curves for the four groups (including radiation therapy-high STEM score, radiation therapy-low STEM score, no radiation therapy-high STEM score, and no radiation therapy-low STEM score) in the TCGA-STAD cohort.

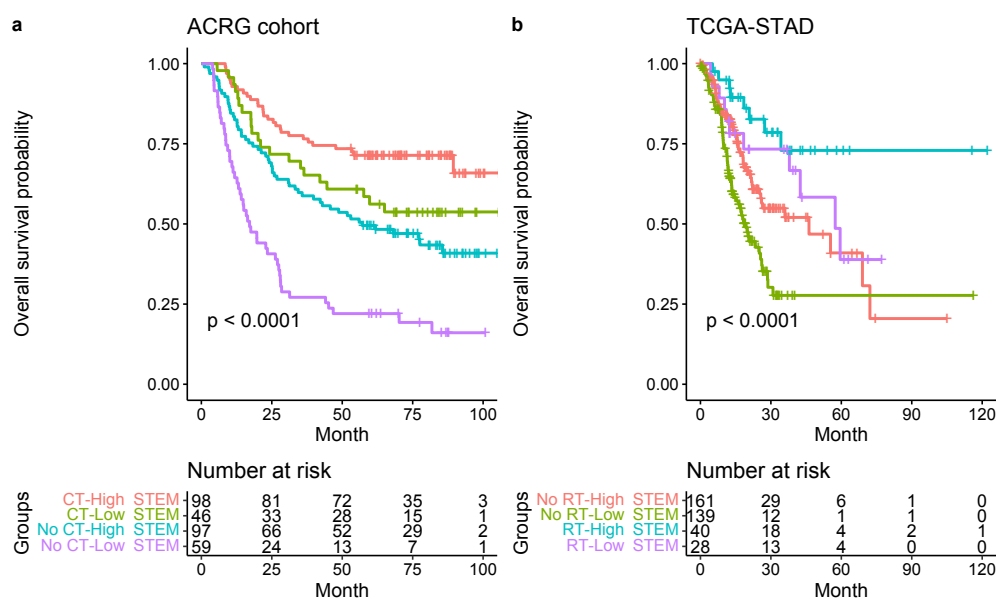

168 By using multivariate Cox regression analysis and univariate Kaplan-Meier analysis in Section 2.3, four  
169 prognostic cell populations of Stromal cell, adaptive T cell, EMEC and Monocyte, referred as STEM popula-  
170 tions, that had been found to be significant in the univariate Cox regression analyses were further examined  
171 to be prognosis stratification factors in gastric cancer. Thus, these four cell populations were selected to  
172 perform cluster analysis of all 1340 GC samples in four GC cohorts. Based on the estimated relative abun-  
173 dance of these four cell populations, we applied spectral clustering with the optimal number of clusters  
174 chosen by NbClust (see Methods for details). The three resulting TME subtypes, including TMEsubtype-H,  
175 TMEsubtype-M, and TMEsubtype-L (with 302, 591, and 447 samples, respectively) were characterized by  
176 a distinct distribution of relative abundance over the four selected cell populations. The relative abundance  
177 of these four cell populations varied significantly across the three TME subtypes ( $p < 2.22 \times 10^{-16}$ , Kruskal-



178 Wallis test; Fig.12). The TMEsubtype-H cluster had the highest stromal cell (mean proportion = 0.48,  
179  $p < 2.22 \times 10^{-16}$ , Wilcoxon test relative to next-highest; Fig.12, left bottom) and monocyte abundance  
180 (mean proportion = 0.29,  $p < 2.22 \times 10^{-16}$ , Wilcoxon test relative to next-highest; Fig.12, right bottom),  
181 while it had the lowest EMEC (mean proportion = 0.17,  $p < 2.22 \times 10^{-16}$ , Wilcoxon test relative to next-  
182 lowest; Fig.12, left top) and adaptive T cell abundance (mean proportion = 0.44,  $p = 0.0036$ , Wilcoxon test  
183 relative to next-lowest; Fig.12, right top). However, in the TMEsubtype-L the opposite was observed. The  
184 TMEsubtype-L cluster was found to have the lowest stromal cell (mean proportion = 0.14,  $p < 2.22 \times 10^{-16}$ ,  
185 Wilcoxon test relative to next-lowest; Fig.12, left bottom) and monocyte abundance (mean proportion =  
186 0.18,  $p = 6.7 \times 10^{-9}$ , Wilcoxon test relative to next-lowest; Fig.12, right bottom), while it had the highest  
187 EMEC (mean proportion = 0.44,  $p < 2.22 \times 10^{-16}$ , Wilcoxon test relative to next-highest; Fig.12, left top)  
188 and adaptive T cell abundance (mean proportion = 0.57,  $p = 0.0036$ , Wilcoxon test relative to next-highest;  
189 Fig.12, right top). The mean proportions of EMEC, stromal cell, adaptive T cell, and monocyte for the  
190 TMEsubtype-M were 0.25, 0.22, 0.47, and 0.2, respectively.

191 We further examined the TME subtypes' association with OS. The TMEsubtype-L had the best prognosis  
192 (OS HR (95% CI) 0.52 (0.42-0.65),  $p < 0.0001$  relative to the TMEsubtype-H, adjusted for age and sex),  
193 the TMEsubtype-M had intermediate prognosis (OS HR (95% CI) 0.76 (0.63-0.91),  $p = 0.0035$  relative  
194 to the TMEsubtype-H, adjusted for age and sex), and the TMEsubtype-H had the least favorable outcome  
195 ( $p < 0.0001$ , log-rank test; Fig.13a). A decreased value of the STEM score, non-immune, or immune score led  
196 to worse outcomes in the TMEsubtype-H (Fig.13b). The survival analysis revealed a substantial difference  
197 in OS among the three TME subtypes. Robust correlations between the identified TME subtypes and OS  
198 were also validated in ACRG ( $p < 0.0001$ , log-rank test; Fig.14a), GSE84437 ( $p = 0.002$ , log-rank test;  
199 Fig.14b), and TCGA-STAD ( $p = 0.014$ , log-rank test; Fig.14c) cohorts, separately. Patients in different GC  
200 cohort were stratified into three groups with significantly distinct prognosis, and it was found that the lower  
201 the STEM score the poorer the patient survival outcome. Although the difference in the GSE15459 cohort  
202 was not statistically significant ( $p = 0.097$ , log-rank test; Fig.14d), the TMEsubtyp-H still had the poorest  
203 outcome.

204 The risk stratification model was further investigated in patients with the same stage GC in the ACRG  
205 and TCGA-STAD data sets. Similarly to the whole cohort, patients with stage IV GC were stratified into  
206 three groups with significantly distinct prognosis (ACRG:  $p = 0.031$ , Fig.15a and TCGA-STAD:  $p = 0.028$ ,  
207 Fig.15b; log-rank test).

208 To investigate the predictive value of the TME subtypes for radiation therapy response in the TCGA-

209 STAD cohort, we evaluated the association between TME subtypes and overall survival among stage III  
 210 patients who either received or did not receive radiation therapy. We found that for patients in the  
 211 TMEsubtype-M and TMEsubtype-L group, radiation therapy was associated with improved OS (HR 0.16,  
 212 95% CI (0.06-0.4),  $p < 0.0001$ ; Fig.16a). However, for patients in the TMEsubtype-H group, performing  
 213 radiation therapy did not improve OS (HR 0.49, 95% CI (0.14-1.72),  $p = 0.25$ ; Fig.16b). The mean STEM  
 214 score of patients in the TMEsubtype-H group is substantially smaller than those in the TMEsubtype-M and  
 215 TMEsubtype-L groups (Fig.16c).

Figure 12: Comparison of the estimated proportions of four prognostic cell populations across three TME subtypes in the meta cohort.

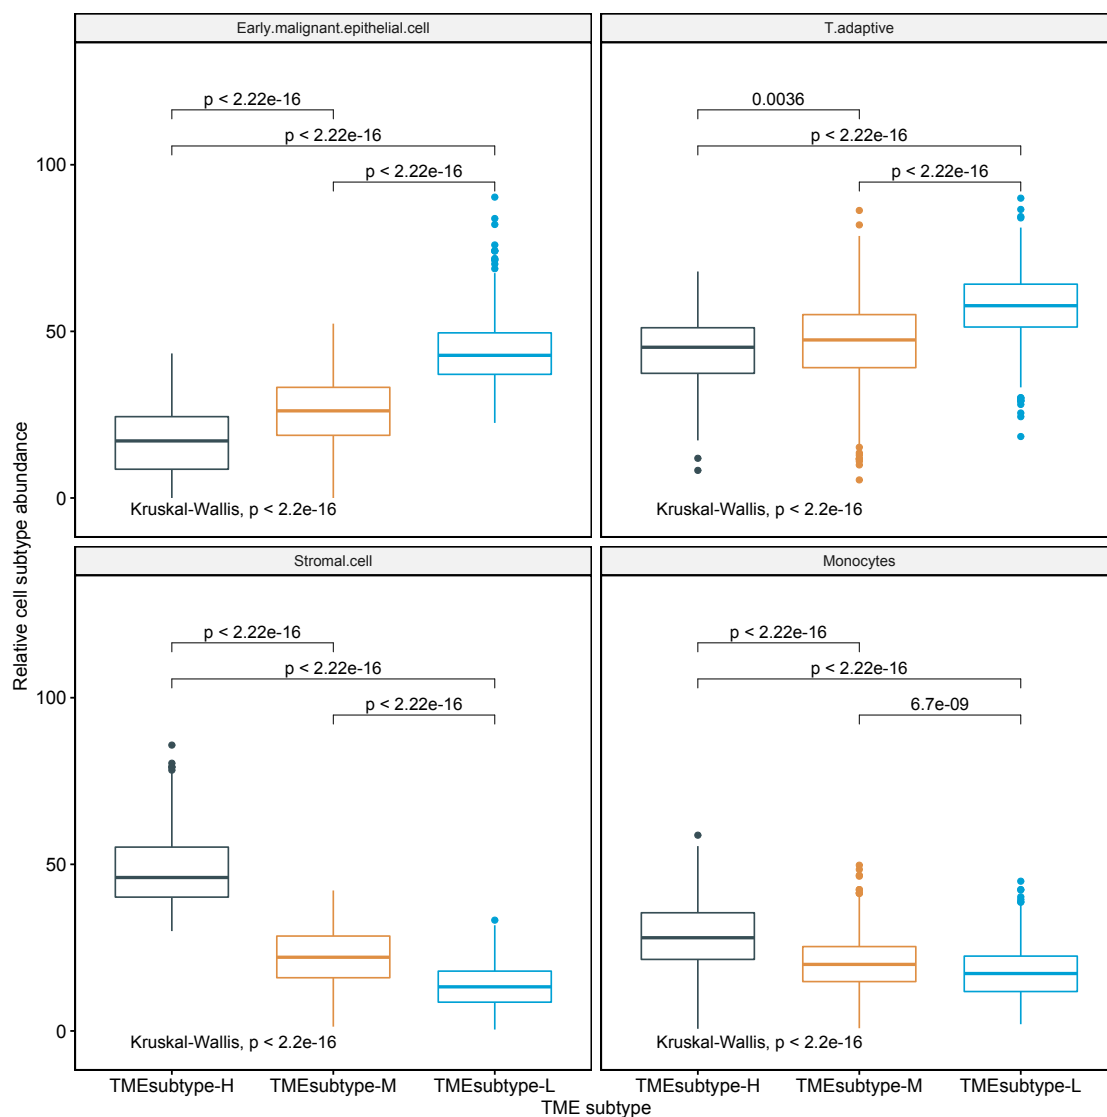

Figure 13: TME subtype in gastric cancer. (a) Kaplan-Meier plots for the OS of patients stratified into three TME subtypes in the meta cohort (ACRG, GSE15459, GSE84437 and TCGA-STAD). Significance test p value is shown in the lower left. (b) The mean non-immune and immune scores with TME subtypes.

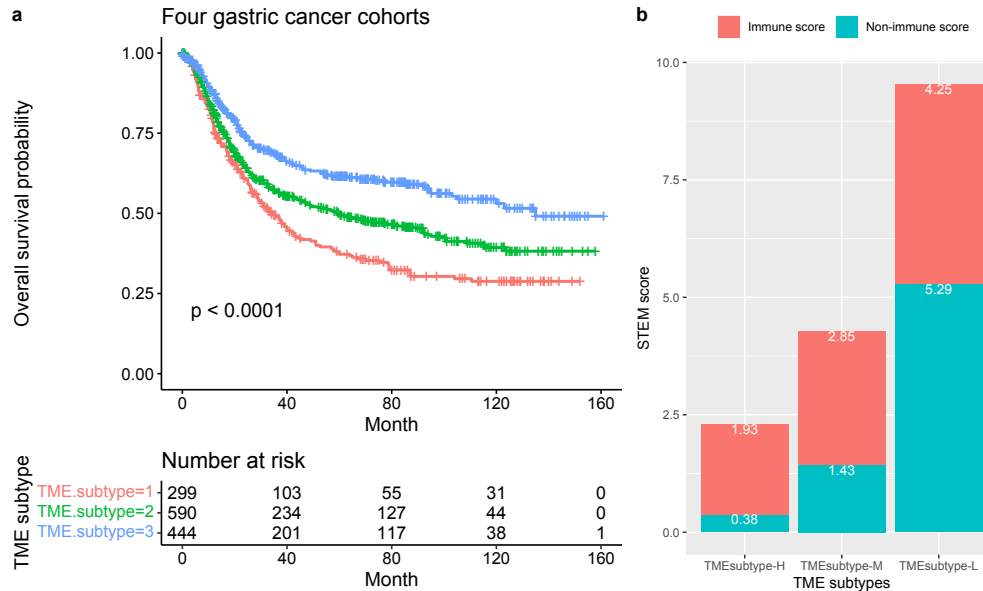

## 216 2.5 Comparison with other reported molecular classifications for GC

217 We compared the similarities and differences of the identified TME subtypes with the molecular subtypes  
 218 derived by the ACRG, as well as with the genomic subtypes derived by the TCGA. The ACRG classified GC  
 219 into four molecular subtypes, including EMT, MSS/TP53-, MSS/TP53+, and MSI, which are associated  
 220 with distinct molecular alterations, disease progression, and survival outcomes based on gene expression  
 221 data. In survival analysis, the MSI subtype had the best prognosis, followed by MSS/TP53+, MSS/TP53-,  
 222 and finally the EMT subtype having the worst prognosis [4]. The comparisons of the TME subtypes with the  
 223 ACRG molecular subtypes showed several differences, for instance, the samples classified as the ACRG EMT  
 224 subtype were present in both the TME subtype-H and TME subtype-M, and the samples classified as ACRG  
 225 MSS (TP53+ and TP53-) and MSI subtypes were present in both the TME subtype-M and TME subtype-  
 226 L. However, we observed that the TME subtype-H, TME subtype-M, and TME subtype-L were enriched in  
 227 ACRG EMT, MSS (TP53+ and TP53-) and MSI, respectively (Fig.17a). Moreover, we investigated the  
 228 association of the TME subtypes with tumor stages. The TME subtype-H was linked to patients classified  
 229 as stage III and IV, whereas the TME subtype-L was associated with patients classified as early stage I and  
 230 II (Fig.17a). We showed previously that a lower STEM score was associated with poorer survival outcome.  
 231 We found similar results when comparing the STEM score across ACRG molecular subtypes. The ACRG

Figure 14: Kaplan-Meier plots for the OS of patients stratified into three TME subtypes in the ACRG (a), GSE84437 (b), TCGA-STAD (c) and GSE15459 (d) cohorts. Significance test p value is shown in the lower left.

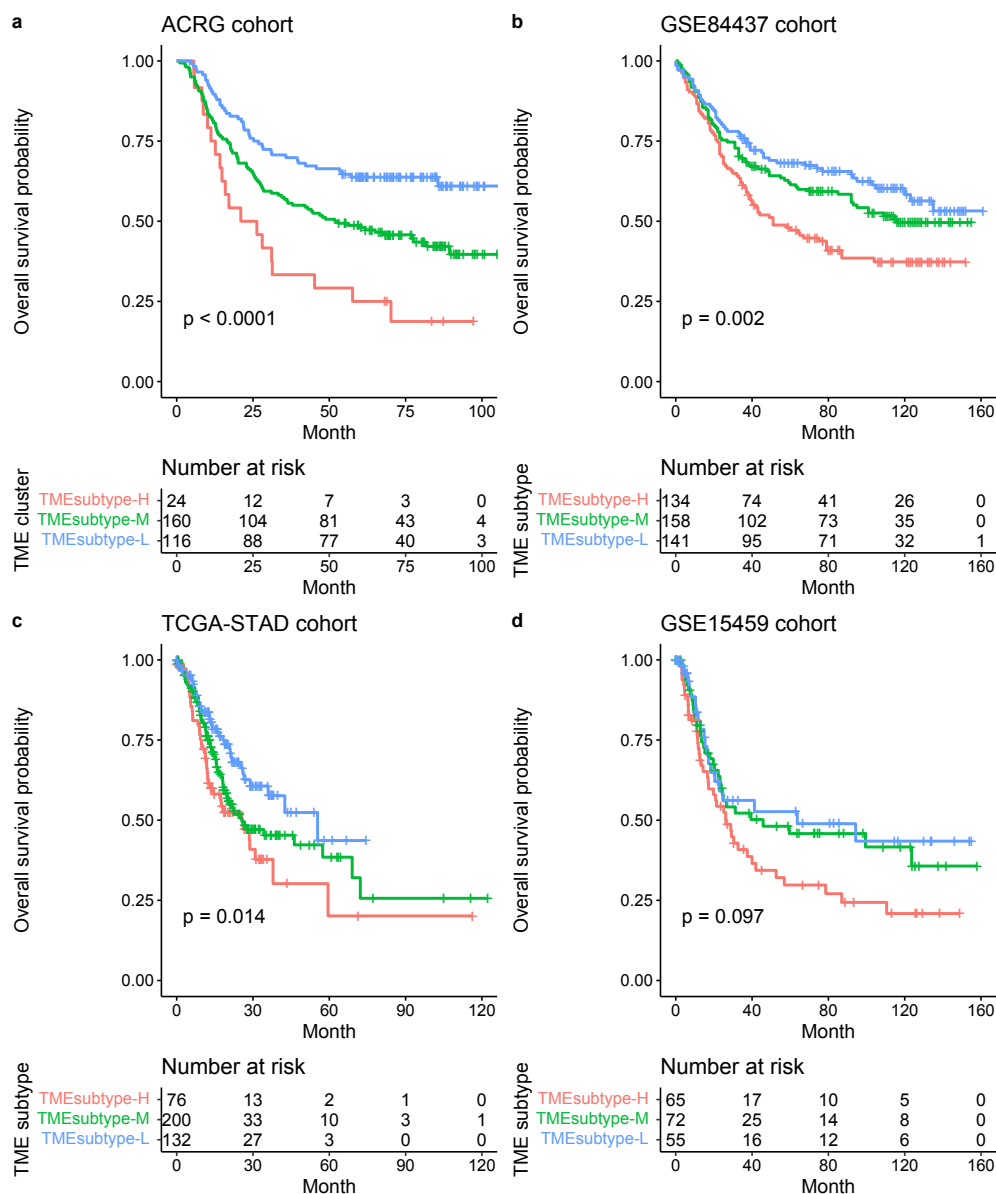

Figure 15: TME subtype in patients with stage IV GC. Kaplan-Meier plots for the OS of patients with stage IV GC stratified into three TME subtypes in the ACRG (a) and TCGA-STAD (b) cohorts.

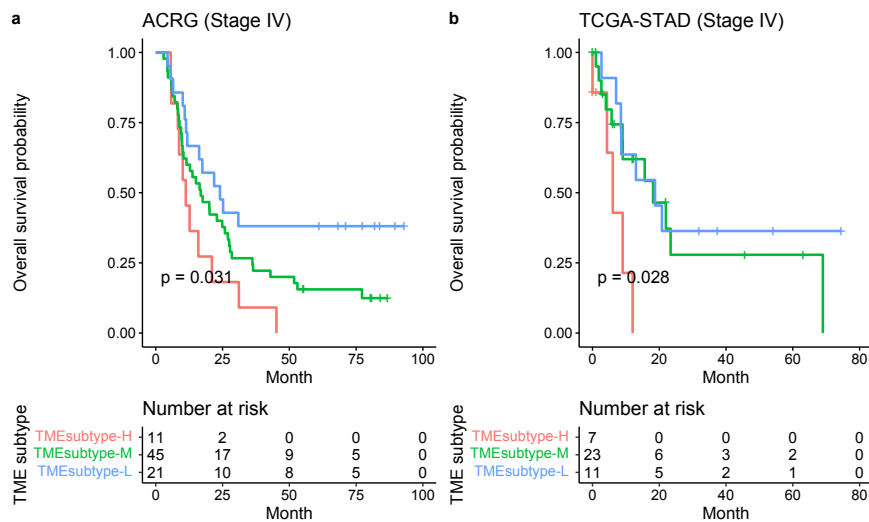

Figure 16: Relationship between the TME subtypes and survival benefit from radiation therapy in matched patients with stage III gastric cancer: (a) TMEsubtype-H, (b) TMEsubtype-M/L. (c) Compare the mean non-immune and immune scores of patients in the TMEsubtype-H to the TMEsubtype-M and -L for stage III disease in the TCGA-STAD cohort.

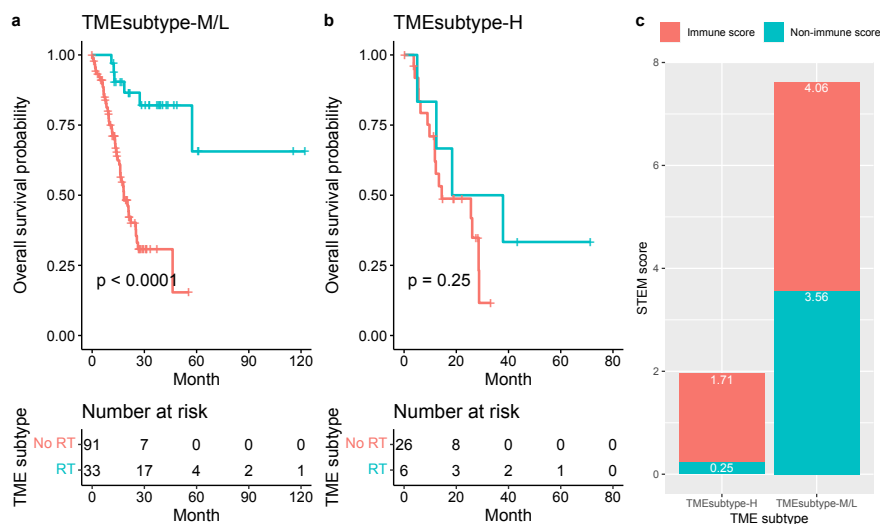

232 EMT subtype, composed mostly of diffuse-type tumors, had been shown to have the worse prognosis of the  
233 four and was linked to the lowest STEM score (mean STEM score = 3.1,  $p = 2.3 \times 10^{-14}$ , Wilcoxon test  
234 relative to next-lowest). The ACRG MSI subtype, which had been shown to have the best prognosis of  
235 four, was linked to the highest STEM score (mean STEM score = 6.49,  $p = 0.0073$ , Wilcoxon test relative  
236 to next-highest). The mean STEM score of the ACRG MSS subtype was 5.73. The STEM score varied  
237 significantly across the four ACRG molecular subtypes ( $p = 3.1 \times 10^{-16}$ , Kruskal-Wallis test; Figure.17b).  
238 Consistent results were found for the non-immune and immune scores across the ACRG molecular subtypes  
239 (Figure.17c).

240 The TCGA research network classified GC into four genomic subtypes, including EBV, MSI, GS, and CIN,  
241 by integrating data from six molecular platforms and performing Microsatellite instability (MSI) testing [5].  
242 The MSI and EBV subtypes were shown to have a better prognosis than GS and CIN subtypes [4, 29,  
243 30]. The comparisons of the TME subtypes with the TCGA genomic subtypes showed similarities, such  
244 as the TMEsubtype-H, TMEsubtype-M, and TMEsubtype-L were enriched in TCGA GS, CIN and MSI,  
245 respectively (Fig.18a). The TMEsubtype-H is primarily composed of samples classified as the TCGA GS  
246 and CIN subtypes. The GC samples classified as TMEsubtype-M were present across all TCGA genomic  
247 subtypes. The TMEsubtype-L is primarily composed of samples classified as the TCGA MSI, EBV, and  
248 CIN subtypes. We found a significantly lower mean STEM score in the TCGA GS (3.57) and CIN (5.7)  
249 subtypes compared to the EBV (9.41) and MSI (11.4) subtypes (Fig.18b), further reinforcing the prognostic  
250 value of the STEM score.

## 251 **2.6 Identification of GC prognostic gene signatures**

252 We have shown predictive values of the EMEC and stromal cell populations for OS. In this respect, we further  
253 investigated prognostic gene signatures of these two cell populations. By using scRNA-seq transcription  
254 profiles, we have identified 150 gene markers for the EMEC and stromal cell populations on the construction of  
255 non-immune signature matrix. For each marker gene, we did multivariate Cox proportional hazard modeling  
256 on the four GC cohorts, respectively, accounting for conventional clinical and pathologic factors including age,  
257 sex, stage, Lauren histology, and adjuvant chemotherapy/radiation therapy treatment if applicable. Next,  
258 we performed fixed effects meta-analyses to identify gene signatures whose expressions were significantly  
259 associated with survival outcome across multiple cohorts.

260 A higher abundance of the stromal cell subtype has been associated with poorer prognosis. Thus, we

Figure 17: Association of TME subtypes and ACRG molecular subtypes. (a) Alluvial plot displaying the association of TME subtypes, ACRG molecular subtype and stage. (b) Comparison of STEM score across three ACRG molecular subtypes. (c) Comparison of non-immune (e.g. ratio of EMEC/stromal cell) and immune scores (e.g. ratio of T adaptive/monocytes) across three ACRG molecular subtypes.

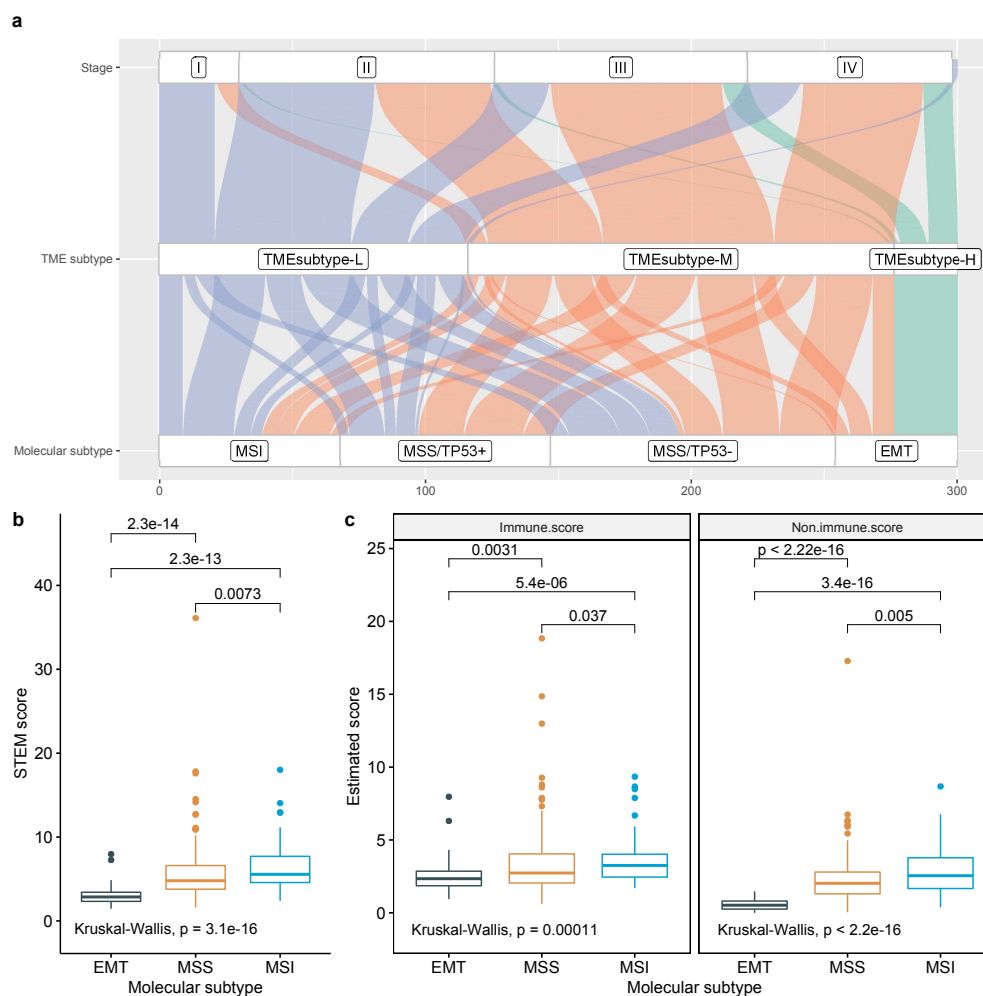

Figure 18: Association of TME subtypes and TCGA genomic subtypes. (a) Alluvial plot displaying the association of TME subtypes and TCGA-STAD subtypes. (b) Comparison of STEM score across four TCGA genomic subtypes.

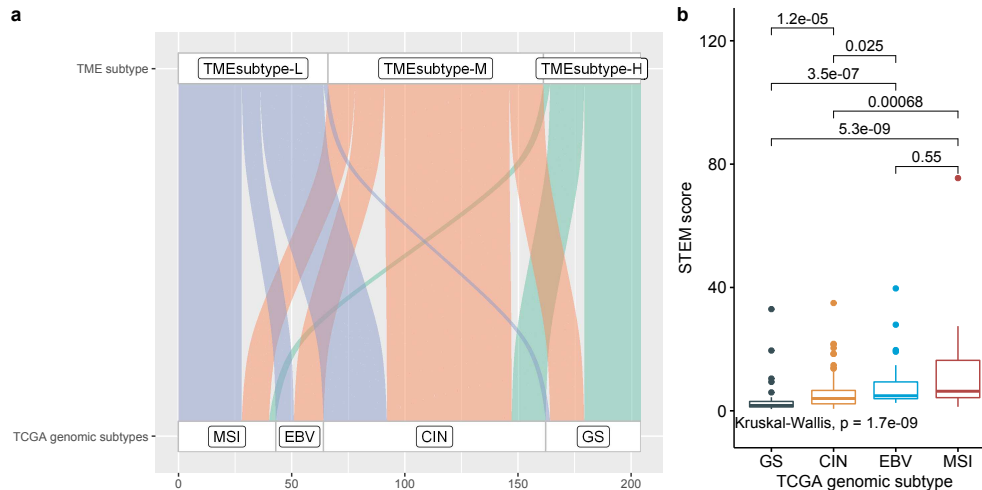

261 identified those prognostic genes for each GC cohort at a p-value cutoff of 0.05, as well as those with a  
 262 hazard ratio greater than 1, which suggest a significant increase in risk. There were 43 significant prognostic  
 263 gene signatures detected after performing meta-analysis ( $p < 10^{-5}$ , z-test for overall effect). The top 8  
 264 genes, including FERMT2 (Fermitin family homolog 2, HR=1.49), SGCE (sarcoglycan epsilon, HR=1.5),  
 265 PPP1R14A (protein phosphatase 1 regulatory inhibitor subunit 14A, HR=1.38), LAMC1 (laminin subunit  
 266 gamma 1, HR=1.83), MYL9 (myosin light chain 9, HR=1.3), TPM2 (tropomyosin 2, HR=1.34), TAGLN  
 267 (transgelin, HR=1.33), and AKAP12 (A-kinase anchoring protein 12, HR=1.4), that have a smaller p value  
 268 for overall effect are shown in Fig.19. We further explored the association between the expression level  
 269 in prognostic marker genes with TME subtypes. We focused on the ACRG cohort. Violin plots indicate  
 270 that the representative prognostic marker genes were highly expressed in TMEsubtype-H with relatively low  
 271 levels in other two TME subtypes: TMEsubtype-M and TMEsubtype-L (Fig.20). The expression levels were  
 272 significantly different among three TME subtypes ( $p < 10^{-21}$ , one-way ANOVA F test).

273 The EMEC subtype showed an opposite trend. A lower abundance of that subtype has been shown to  
 274 be associated with poorer prognosis. We therefore identified the prognostic genes for each GC cohort at a  
 275 p-value cutoff of 0.05, as well as with a hazard ratio below 1, which suggests a significantly smaller risk. No  
 276 significant prognostic genes were found across all four GC cohorts, therefore, we just kept the genes that  
 277 were significantly prognostic across three of the four GC cohorts for further analysis. Finally, four significant  
 278 prognostic gene signatures, including KCNQ1 (potassium voltage-gated channel subfamily Q member 1,



279 HR=0.73), SURF6 (surfeit 6, HR=0.57), AGMAT (agmatinase, HR=0.79), and MRPS2 (mitochondrial  
280 ribosomal protein S2, HR=0.6), were detected after performing meta-analysis ( $p < 10^{-5}$ , z-test for overall  
281 effect; Fig.21). Violin plots for the ACRG cohort indicated the representative prognostic marker genes were  
282 highly expressed in TMEsubtype-L with relatively low levels in other two TME subtypes (Fig.22). The  
283 expression levels were significantly different among three TME subtypes ( $p < 0.001$ , one-way ANOVA F  
284 test).

### 285 3 Discussion

286 In the present study, a comprehensive and systematic analysis of diverse epithelial, stromal, and immune  
287 cell types within the TME and their associations with GC risk was developed. We examined several large  
288 cohorts of GC patients at the cellular level and found a new and strong independent prognostic factor (STEM  
289 score) for GC patients. The STEM score was defined as the arithmetic sum of the two most significant TME  
290 factors: EMEC to stromal ratio and adaptive T cell to monocyte ratio. Our results suggest that high-risk  
291 patient groups (STEM score  $\leq 3.95$ ) have significantly shorter OS times than patients in the low-risk group  
292 (STEM score  $> 3.95$ ).

293 Stromal cells, especially cancer-associated fibroblasts (CAFs), in the TME have been found to promote  
294 growth and survival of malignant cells [31]. Many studies have found that cancer cells release factors  
295 promoting fibroblasts to secrete tumor-promoting chemokines [32]. The interactions of tumors and CAFs  
296 can lead to increased malignancy in many cancer types [33,34]. Several studies of GC suggest that low tumor  
297 to stroma ratio (TSR) is associated with poor prognosis [19,35]. Herein, we analyzed a gastric scRNA-seq  
298 data set that covered diverse epithelial cell types isolated from patients with NAG, CAG, IM, and EGC, and  
299 identified the EMEC population. The EMEC to stromal cell ratio was shown to have significant correlation  
300 to OS, which agreed with previous studies on the positive prognostic value of TSR. The EMEC population  
301 is comprised of cancer cells, MSCs, PCs, and PMCs that emerged uniformly in the EGC biopsy and were  
302 predominantly present in tumor samples but not typically found in adjacent normal samples. Additionally,  
303 significantly higher EMEC populations were detected in patients with stage I cancer than stage II, III, or  
304 IV, suggesting the value of the EMEC population in the early detection of gastric cancer.

305 There is increasing evidence that suggests a strong infiltration of T cells, especially CD8+ T cells, into  
306 the TME correlates with a good prognosis in many types of cancer and has implications for success of  
307 active cancer immunotherapy [36,37]. Studies have shown that CD8+ T cells play a vital role in mediating

Figure 19: Forest plot of estimated hazard ratios of prognostic gene signatures in stromal cell subtype.

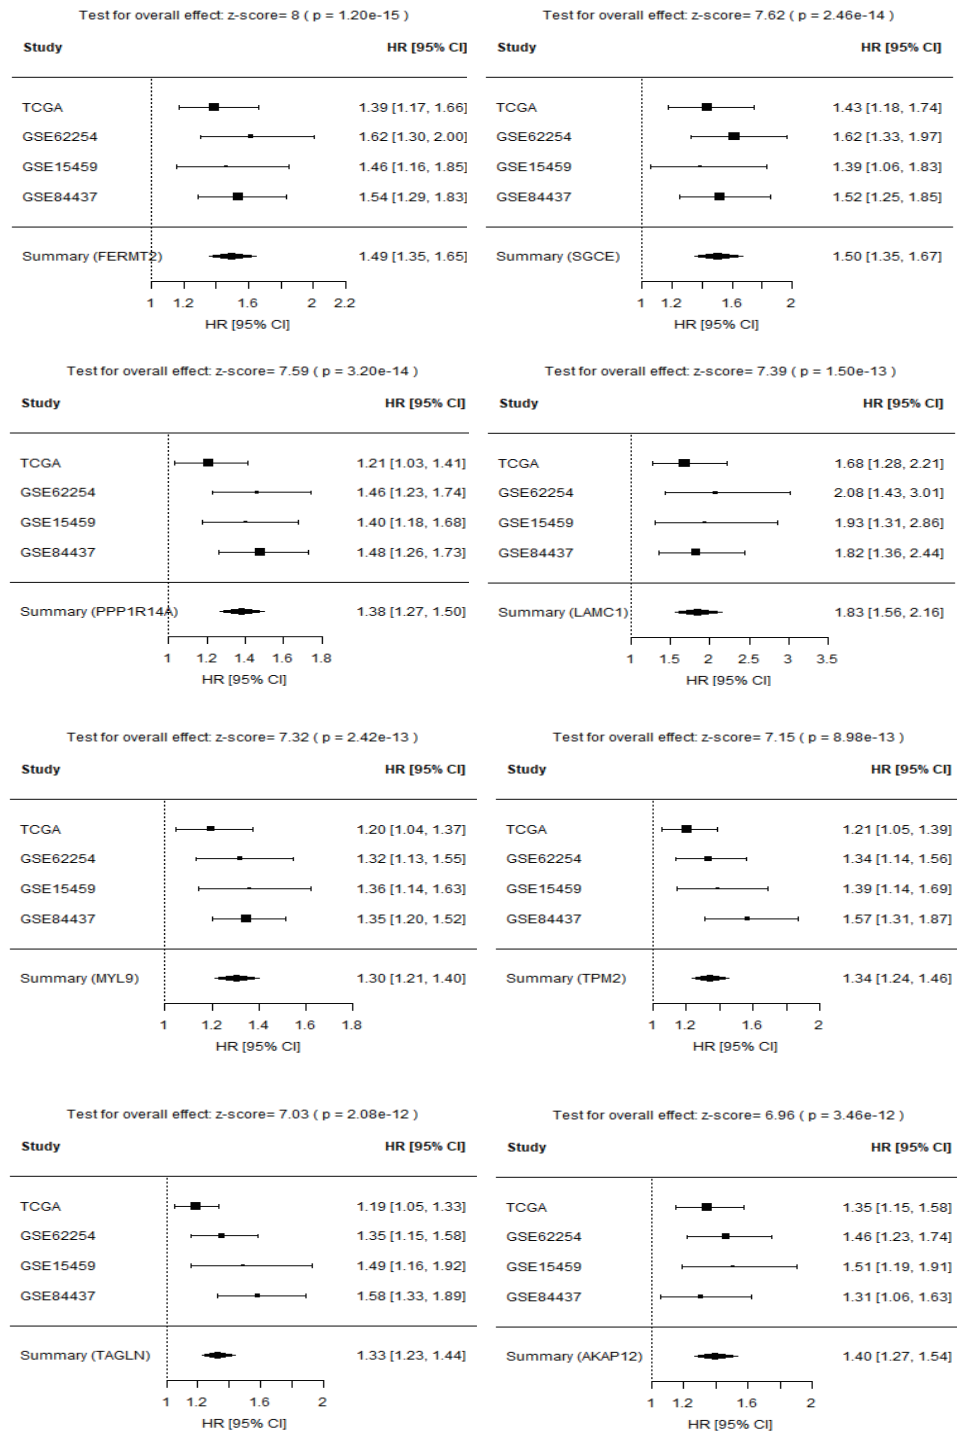

Figure 20: Violin plots showing differential expression of representative stromal cell markers in three TME subtypes.

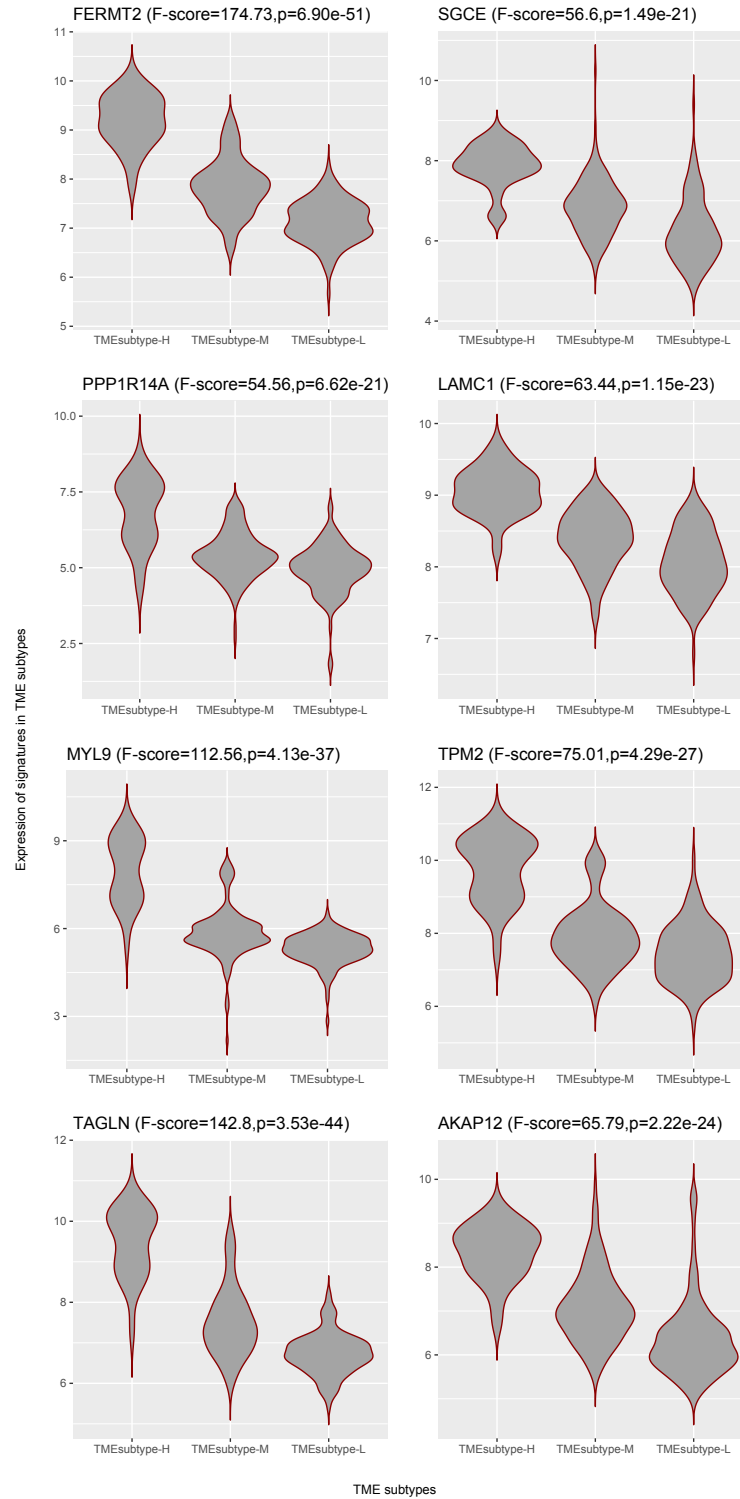

Figure 21: Forest plot of estimated hazard ratios of prognostic gene signatures in EMEC population.

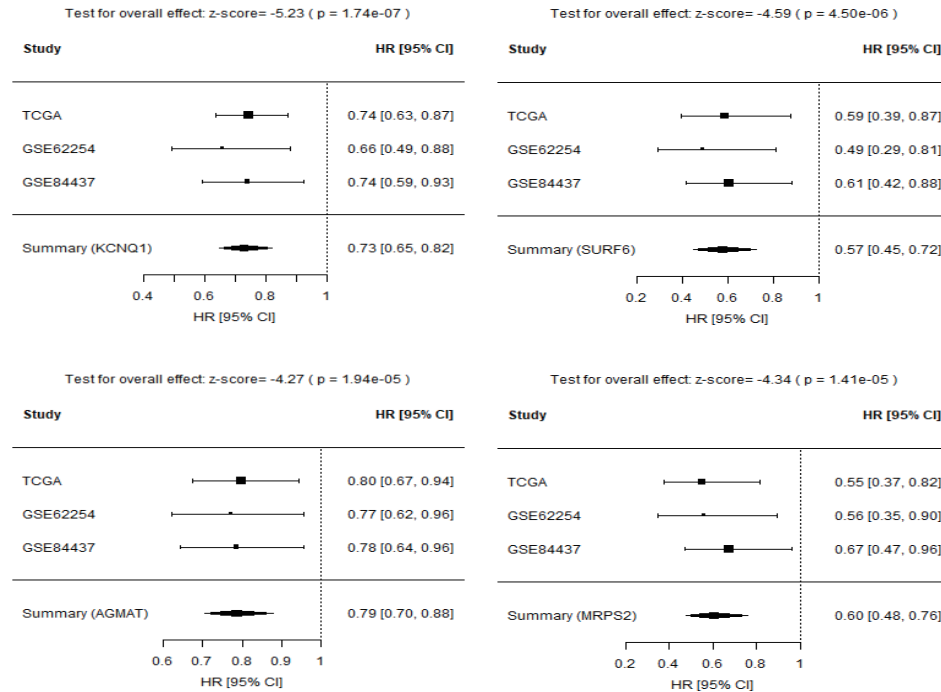

308 anti-tumor immunity, and cytotoxic CD8+ memory T cells kill tumor cells by recognizing tumor-associated  
 309 antigens presented on major histocompatibility complex class I [38–40]. High numbers of CD4+ T helper  
 310 1 cells in the TME also correlate with better prognosis [40]. Tumor-associated macrophages were found to  
 311 enhance malignant cell migration, invasion, and metastases [41]. Monocytes can give rise to macrophages, so  
 312 the abundance of monocytes may lead to increased production of macrophages. In our study of GC cohort,  
 313 an increased adaptive T cell to monocyte ratio was significantly associated with increased OS. This is in  
 314 line with studies by [42] of haematologic malignancies and [43] of stage III colon cancer. The studies of  
 315 haematologic malignancies and stage III colon cancer demonstrate that an elevated lymphocyte to monocyte  
 316 ratio (LMR) yields better survival outcome.

317 Molecular signatures associated with distinct clinical outcomes have been studied in many types of cancer  
 318 [5,44,45]. We identified several gene signatures of the EMEC and stromal cell populations to be independent  
 319 prognostic factors of OS in multivariate analysis. Several prognostic gene signatures of stromal cells have  
 320 been previously reported to play oncogenic roles in cancer cell proliferation, migration, or invasion. FERMT2  
 321 (also known as Kindlin-2), a focal adhesion protein, has been found to regulate cancer cell proliferation,

Figure 22: Violin plots showing differential expression of representative EMEC markers in three TME subtypes.

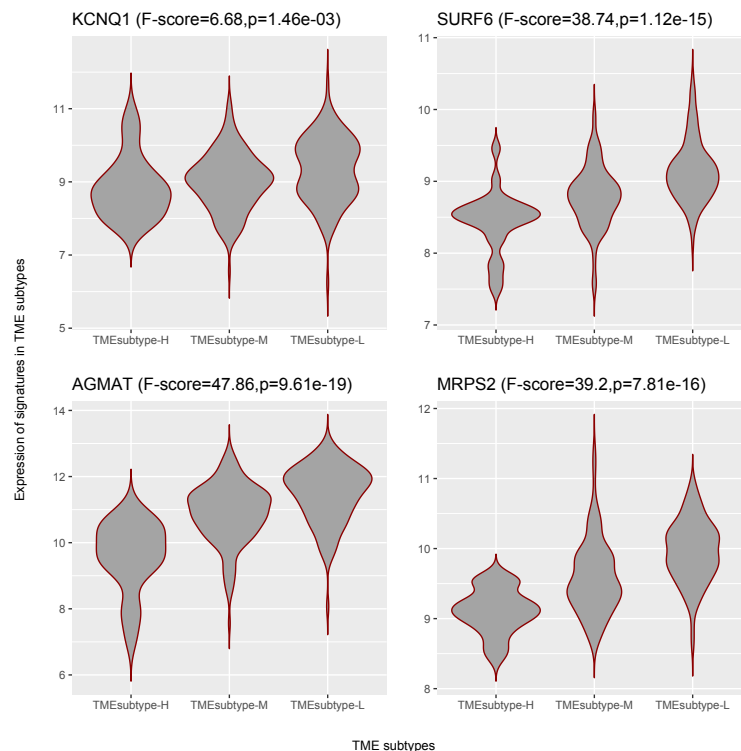

322 apoptosis, and chromosomal abnormalities in breast cancer that are associated with tumor stromal invasion,  
323 lymph node metastasis, and patient outcome in gastric cancer. Overexpression of FERMT2 promotes tumor  
324 formation in breast cancer and was linked with poorer patient outcomes [46, 47]. TAGLN is expressed in  
325 fibroblasts and smooth muscle, and the overexpression of TAGLN has been found in the tumor-induced  
326 reactive myofibroblastic stromal tissue in lung adenocarcinoma, as well in carcinomas of the stomach, liver,  
327 and oesophagus [48]. Silencing of TAGLN2, a homologue of TAGLN, has been reported to significantly  
328 inhibit cell proliferation and increase of apoptosis in bladder cancer [49]. MYL9 was previously found to  
329 be over-expressed in stages III and IV non-small cell lung cancer [50]. Overexpression of MYL9 in tumor  
330 cells was associated with poorer OS and recurrence-free survival in esophageal squamous cell carcinoma [51].  
331 TPM2, a marker of fibroblast, was previously reported to be associated with poor prognosis in colorectal  
332 cancer [52]. The TAGLN, MYL9 and TPM2 were found to be over-expressed in fibroblasts from primary  
333 tumors compared to adjacent normal tissues and were associated with poorer prognosis in the TCGA cohort  
334 of colorectal cancer [52]. PPP1R14A has been investigated as a prognostic biomarker of gastric cancer [53].  
335 LAMC1 was found to be a target of miR-29s. Silencing of LAMC1 significantly inhibited cell migration and

336 invasion in prostate cancer cells [54]. AKAP12 has been investigated as a tumor suppressant in some human  
337 primary cancers, including GC [55,56], however, in the present study we found it significantly over-expressed  
338 in the TMEsubtype-H high risk group, suggesting an increased risk on OS with higher expression level.

339 Herein, we identified four prognostic gene signatures of EMEC population to be positively associated  
340 with OS. AGMAT were found to be positively associated with OS in kidney renal clear cell carcinoma [57].  
341 MRPS2 encoding the mitochondrial ribosomal protein S2 was important for mitoribosome formation and  
342 stability, and mitochondrial translation. It was reported to predict poor OS in ovarian cancer patients [58].  
343 However, we found that it was associated with better clinical outcome in GC patients. KCNQ1 has been  
344 shown to distribute widely and be functionally relevant in a variety of epithelial tissues [59]. There is  
345 preliminary evidence to suggest that KCNQ1 is a tumor suppressor in the stomach and colon [60,61]. Low  
346 or loss expression of KCNQ1 was previously found to associated with poor disease-free survival in stage II  
347 and III colon cancer patients [62].

348 In conclusion, we identified significant prognostic factors and gene signatures among diverse epithelial,  
349 stromal, and immune cell populations in the GC TME. This study demonstrated the STEM score as a TME  
350 prognostic factor for GC. It showed that a lower STEM score was significantly associated with a shorter  
351 survival time. The entire GC cohort was stratified into three risk groups (high-, moderate-, and low-risk)  
352 based on the four STEM populations, which yielded incremental survival times. The risk stratification model  
353 may aid stratification of patients with stage III gastric cancer for radiation therapy.

## 354 4 Materials and Methods

### 355 4.1 Gastric cancer bulk gene expression data

356 We collected four GC gene expression datasets with the associated clinical, pathological, and outcome  
357 data: GSE62254 (ACRG), GSE15459, GSE84437, and TCGA-STAD (stomach adenocarcinoma). The  
358 ACRG and GSE15459 data sets contained gene expression profiles of 300 and 192 patients, respectively.  
359 The raw data (CEL files) of these two data sets were downloaded from Gene Expression Omnibus (GEO,  
360 [www.ncbi.nlm.nih.gov/geo/](http://www.ncbi.nlm.nih.gov/geo/)). The CEL files were MAS5 normalized in the R environment using the affy  
361 software package. Both data sets were converted to gene-specific expression matrices using the R package  
362 hgu133plus2.db. For the GSE84437 data set, we directly downloaded its expression matrix after using quan-  
363 tile normalization from GEO. The R package illuminaHumanv3.db was used to translate probe identifications

364 (IDs) to gene symbols. When multiple probes were present for one gene, we selected the probe with the  
365 highest average expression across the samples. The TCGA-STAD data set from The Cancer Genome Atlas  
366 (TCGA) was downloaded by using the `getTCGA` function of R package `TCGA2STAT`. This returned a gene  
367 expression matrix of RSEM [63] values.

368 The corresponding clinical, pathological, and outcome data of these data sets were collected as follows. We  
369 collected clinical data of the ACRG cohort from the supplementary materials of the original publication [4].  
370 For the GSE15459 and GSE84437 cohorts clinical data was retrieved from the GEO database. We used the  
371 `getTCGA` function of R package `TCGA2STAT` to obtain clinical and OS data for the TCGA-STAD cohort.

## 372 **4.2 Identification of ten non-immune cell populations from single-cell RNA-Seq** 373 **of gastric antral mucosa biopsies**

374 The single-cell RNA-seq data of patients with gastric premalignant lesions and early GC were downloaded  
375 from the GEO database with accession number GSE134520. This data set, profiled by 10X Chromium v2  
376 (3' assay), consists of 32,332 cells from nine patients with non-atrophic gastritis (NAG), chronic atrophic  
377 gastritis (CAG), intestinal metaplasia (IM), and early gastric cancer (EGC). We only included non-immune  
378 cell types with more than 20 cells' sequencing data available at two or more stages for further analysis.  
379 During quality control, we further excluded cells with fewer than 500 expressed genes and removed genes  
380 detected in less than 2% cells, leaving 9926 genes in a total of 24,874 single cells.

381 To explore the hierarchical relationship among cell types in the cascade from gastritis to EGC, agglom-  
382 erative hierarchical clustering was performed on the gastric scRNA-seq data set. The counts of single cell  
383 gene expression data were summarized across all cells mapped to the same cell type and subject. We then  
384 normalized the count summarization matrix by the transcripts per million (TPM) method. Next, we used  
385 the two-way analysis of variance (ANOVA)  $F$  test to identify cell type specific expressed genes. The main  
386 effects of cell type and subject were analyzed. The ANOVA analysis tested for differentially expressed genes  
387 between a cell type and all other cells. We selected the top 100 genes with high  $F$  value of cell type compared  
388 to  $F$  value of subject. We next computed the mean expression for the cell type specific expressed genes across  
389 expression profiles mapped to the same cell type and stage. The hierarchical cluster tree was generated using  
390 Pearson correlation coefficient ( $\frac{1-r}{2}$ ) as the pairwise distance on the log-transformed mean expression profiles  
391 and Ward's linkage distance as the cluster distance. Ten non-immune cell populations consisting of EMEC,  
392 PMEC, enteroendocrine, GMC, goblet cell, MSC, PC, PMC, endothelial cell, and stromal cell were identified

393 from the cluster tree (Fig.1). The mapping of 11 non-immune cell types of patients with NAG, CAG, IM,  
394 and EGC to 10 cell populations is provided in Table 5 and Fig. 23.

Figure 23: The t-SNE plot of whole transcriptomes of 24874 cells from gastric antral mucosa biopsies. (a) The 11 cell types are denoted by distinct colours. (b) The 10 identified cell populations are denoted by distinct colours. (c) The 4 stages are denoted by distinct colours.

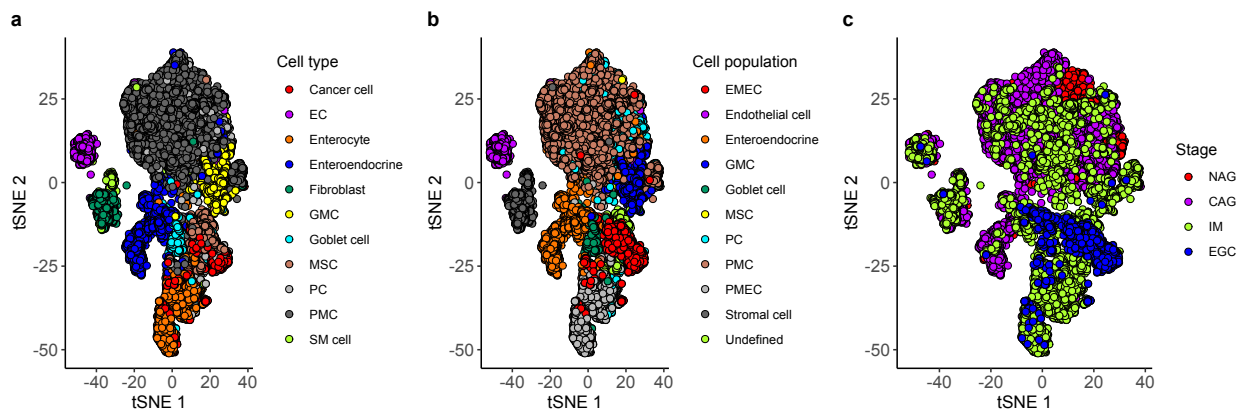

### 395 4.3 Marker selection and signature matrix construction

396 To estimate the proportions of non-immune cell populations in the gastric samples we created a signature  
397 matrix composed of the characteristic expression profiles for each of the 10 non-immune cell populations.  
398 This signature matrix distinguished EMEC, P MEC, enteroendocrine, GMC, goblet cell, MSC, PC, PMC,  
399 endothelial cell, and stromal cell populations. The matrix was generated based on the gastric single cell data.  
400 The counts of single cell gene expression data were summarized across all cells mapped to the same cell type  
401 and subject, then normalized to the count summarization matrix by the TPM method. The expression  
402 profiles were averaged within each cell population. This generated a matrix of genes  $\times$  cell populations.  
403 The signature matrix was defined as the sub-matrix formed by a set of cell population-specific marker genes.  
404 The marker genes were selected by first selecting genes with a two-fold or higher over differential expressed  
405 between one cell population and all other cell populations, then filtering out non-significant genes with a  
406 p-value larger than 0.01 (one-way ANOVA analysis tested for each gene between a cell population and all  
407 other cells). Next, we ranked genes in decreasing order by their fold changes and selected the top 150  
408 genes for each cell population, which resulted in a signature matrix of 1319 genes by 10 cell populations.  
409 The signature matrix and gene signatures for each non-immune cell population are available on Github  
410 (<https://github.com/wenjshen/STEM>).



Table 5: Grouping of the non-immune cell types for bulk gene expression samples deconvolution.

| Non-immune cell types | Full name                      | Stages | Grouping for Bulk deconvolution |
|-----------------------|--------------------------------|--------|---------------------------------|
| Cancer cell           | Cancer cell                    | EGC    | EMEC                            |
| MSC                   | Metaplastic stem-like cell     | EGC    | EMEC                            |
| PC                    | Proliferative cell             | EGC    | EMEC                            |
| PMC                   | Pit mucous cell                | EGC    | EMEC                            |
| EC                    | Endothelial cell               | CAG    | Endothelial cell                |
| EC                    | Endothelial cell               | EGC    | Endothelial cell                |
| EC                    | Endothelial cell               | IM     | Endothelial cell                |
| EC                    | Endothelial cell               | NAG    | Endothelial cell                |
| Enteroendocrine       | Enteroendocrine cell           | CAG    | Enteroendocrine                 |
| Enteroendocrine       | Enteroendocrine cell           | EGC    | Enteroendocrine                 |
| Enteroendocrine       | Enteroendocrine cell           | IM     | Enteroendocrine                 |
| Enteroendocrine       | Enteroendocrine cell           | NAG    | Enteroendocrine                 |
| GMC                   | Antral basal gland mucous cell | CAG    | GMC                             |
| GMC                   | Antral basal gland mucous cell | EGC    | GMC                             |
| GMC                   | Antral basal gland mucous cell | IM     | GMC                             |
| GMC                   | Antral basal gland mucous cell | NAG    | GMC                             |
| Goblet cell           | Goblet cell                    | CAG    | Goblet cell                     |
| Goblet cell           | Goblet cell                    | EGC    | Goblet cell                     |
| Goblet cell           | Goblet cell                    | IM     | Goblet cell                     |
| Goblet cell           | Goblet cell                    | NAG    | Goblet cell                     |
| MSC                   | Metaplastic stem-like cell     | CAG    | MSC                             |
| MSC                   | Metaplastic stem-like cell     | NAG    | MSC                             |
| PC                    | Proliferative cell             | CAG    | PC                              |
| PC                    | Proliferative cell             | IM     | PC                              |
| PC                    | Proliferative cell             | NAG    | PC                              |
| PMC                   | Pit mucous cell                | CAG    | PMC                             |
| PMC                   | Pit mucous cell                | IM     | PMC                             |
| PMC                   | Pit mucous cell                | NAG    | PMC                             |
| Cancer cell           | Cancer cell                    | CAG    | PMEC                            |
| Cancer cell           | Cancer cell                    | IM     | PMEC                            |
| Enterocyte            | Enterocyte                     | CAG    | PMEC                            |
| Enterocyte            | Enterocyte                     | EGC    | PMEC                            |
| Enterocyte            | Enterocyte                     | IM     | PMEC                            |
| Enterocyte            | Enterocyte                     | NAG    | PMEC                            |
| Fibroblast            | Fibroblast                     | CAG    | Stromal cell                    |
| Fibroblast            | Fibroblast                     | EGC    | Stromal cell                    |
| Fibroblast            | Fibroblast                     | IM     | Stromal cell                    |
| Fibroblast            | Fibroblast                     | NAG    | Stromal cell                    |
| SM cell               | Smooth muscle cell             | CAG    | Stromal cell                    |
| SM cell               | Smooth muscle cell             | IM     | Stromal cell                    |
| SM cell               | Smooth muscle cell             | NAG    | Stromal cell                    |
| Cancer cell           | Cancer cell                    | NAG    | Undefined                       |
| MSC                   | Metaplastic stem-like cell     | IM     | Undefined                       |

411 To quantify the proportions of immune cell populations, we used a signature matrix provided in [64]  
412 consisting of 1296 genes in 17 immune cell types whose transcriptomic profiling was sorted by RNA-seq.  
413 This signature matrix covers the majority of cells that constitute a PBMC sample. We then merged these  
414 17 immune cell types into 7 major lineages according to their biological similarity, resulting in 7 immune  
415 cell populations: adaptive T cells, innate T cells, adaptive B cells, natural killer cells, monocytes, dendritic  
416 cells, and granulocytes (Table 6).

Table 6: Grouping of the immune cell types for bulk gene expression samples deconvolution.

| Immune cell types | Full name                               | Grouping for Bulk deconvolution |
|-------------------|-----------------------------------------|---------------------------------|
| Monocytes C       | Classical monocytes                     | Monocytes                       |
| Monocytes NC+I    | Non-classical/intermediate monocytes    | Monocytes                       |
| NK                | Natural killer cells                    | NK                              |
| T gd non-Vd2      | $\gamma\delta$ non-V $\delta$ 2 T cells | T Innate                        |
| T gd Vd2          | $\gamma\delta$ V $\delta$ 2 T cells     | T Innate                        |
| Neutrophils LD    | Low-density neutrophils                 | Granulocytes                    |
| Basophils LD      | Low-density basophils                   | Granulocytes                    |
| mDCs              | Myeloid dendritic cells                 | DCs                             |
| pDCs              | Plasmacytoid dendritic cells            | DCs                             |
| T CD8 Naive       | Nave CD8 T cells                        | T adaptive                      |
| T CD8 Memory      | Memory CD8 T cells                      | T adaptive                      |
| B Naive           | Naive B cells                           | B adaptive                      |
| B Memory          | Memory B cells                          | B adaptive                      |
| Plasmablasts      | Plasmablasts                            | B adaptive                      |
| T CD4 Naive       | Nave CD4 T cells                        | T adaptive                      |
| T CD4 Memory      | Memory CD4 T cells                      | T adaptive                      |
| MAIT              | Mucosal associated invariant T cells    | T Innate                        |

#### 417 **4.4 Deconvolving bulk gene expression samples**

418 For the deconvolution of the bulk RNA-seq data, the expression profiles of bulk samples were normalized  
419 for sequencing depth and gene length using the Transcripts Per Million (TPM) method [65]. We performed  
420 deconvolution with support vector regression using the CIBERSORT algorithm [25].

421 The microarray data was quantile normalized. We next used the CIBERSORTx method [23] to deconvolve  
422 bulk samples. Additionally, batch correction was applied to reduce cross-platform variance.

423 The deconvolution method was combined with the signature matrices of non-immune and immune cell  
424 populations, respectively, to estimate non-immune and immune cell relative fractions of GC samples. Since  
425 CIBERSORT and CIBERSORTx estimated relative but not absolute fractions of cell populations within  
426 a sample, the values may not be comparable across samples. We therefore defined non-immune scores (or  
427 immune scores) by calculating the ratios of relative fractions in each pair of non-immune (or immune) cell  
428 populations. The non-immune or immune scores are therefore comparable across samples.

#### 429 **4.5 GO enrichment analyses**

430 The functional classification of the EMEC gene signatures was analyzed in the GO. The R package clus-  
431 terProfiler [66] (version 3.18.1) was used to identify and visualize enriched GO terms. Significance in all  
432 enrichment analyses were based on BH-corrected  $p$  value  $< 0.1$  and the gene counts  $\geq 2$ .

#### 433 **4.6 Determination of Optimal STEM score cutoff**

434 To identify the statistically optimal cutoff of the STEM score, we analyzed the influence of the STEM  
435 score on survival outcome in the ACRG cohort by using univariate Cox proportional hazard modeling. The  
436 analysis was performed for a dense set of quantiles from 0.1th to 0.9th, with a 0.01 step. Each analysis  
437 divided the entire cohort into two groups, and the cutoff that minimized the P-value for testing the risk  
438 difference between the two groups was selected.

#### 439 **4.7 TME subtypes identification in GC**

440 Each GC sample is represented by four input features of the estimated relative abundance of the cell popu-  
441 lations: EMECs, stromal cells, adaptive T cells, and monocytes. Spectral clustering was performed on the  
442 meta-cohort (ACRG, GSE15459, GSE84437, and TCGA-STAD) by using the radial basis kernel function to  
443 measure the similarity between two samples, which was implemented in the R kernlab package. The optimal

444 number of clusters was chosen using the NbClust function, which was implemented in the R NbClust [67]  
445 package. NbClust utilizes 26 different cluster validity indices with Euclidean as the distance measurement  
446 method and Ward's hierarchical clustering as the clustering method to generate a majority rules number of  
447 clusters for the GC data set.

## 448 4.8 Statistical analysis

449 All the statistical analyses were performed in the R environment (version 4.0.3). Cumulative survival time  
450 was calculated using the Kaplan-Meier method and the differences in survival curves were analyzed using  
451 the log-rank test from R package survminer. Univariate and multivariate analyses were conducted using  
452 the Cox proportional hazards regression modeling using the R package survival. For all tests, the  $p$ -value  
453 cutoff for statistical significance was set as 0.05 as default unless an alternative value is specified. Statistical  
454 significance between tumor samples and adjacent normal samples was assessed using Student's  $t$  test and  
455 indicated as follows: \* $p < 0.05$ , \*\* $p < 0.01$ , \*\*\* $p < 0.001$ , \*\*\*\* $p < 0.0001$ .

## 456 5 Data availability

457 The data analyzed in this study are available from the Gene Expression Omnibus (accession numbers:  
458 GSE62254; GSE15459; GSE84437; GSE134520), The Cancer Genome Atlas Project or from the authors  
459 upon reasonable request.

## 460 References

- 461 [1] Jacques Ferlay, M Colombet, I Soerjomataram, C Mathers, DM Parkin, M Piñeros, A Znaor, and  
462 F Bray. Estimating the global cancer incidence and mortality in 2018: Globocan sources and methods.  
463 *International journal of cancer*, 144(8):1941–1953, 2019.
- 464 [2] Pekka Lauren. The two histological main types of gastric carcinoma: diffuse and so-called intestinal-type  
465 carcinoma: an attempt at a histo-clinical classification. *Acta Pathologica Microbiologica Scandinavica*,  
466 64(1):31–49, 1965.
- 467 [3] Ming Teh and Yoke-Sun Lee. Intestinal and diffuse carcinoma of the stomach among the ethnic and  
468 dialect groups in singapore. *Cancer*, 60(4):921–925, 1987.

- 469 [4] Razvan Cristescu, Jeeyun Lee, Michael Nebozhyn, Kyoung-Mee Kim, Jason C Ting, Swee Seong Wong,  
470 Jiangang Liu, Yong Gang Yue, Jian Wang, Kun Yu, et al. Molecular analysis of gastric cancer identifies  
471 subtypes associated with distinct clinical outcomes. *Nature medicine*, 21(5):449–456, 2015.
- 472 [5] Cancer Genome Atlas Research Network et al. Comprehensive molecular characterization of gastric  
473 adenocarcinoma. *Nature*, 513(7517):202–209, 2014.
- 474 [6] Gloria H Heppner and Bonnie E Miller. Tumor heterogeneity: biological implications and therapeutic  
475 consequences. *Cancer and Metastasis Reviews*, 2(1):5–23, 1983.
- 476 [7] Ash A Alizadeh, Victoria Aranda, Alberto Bardelli, Cedric Blanpain, Christoph Bock, Christine  
477 Borowski, Carlos Caldas, Andrea Califano, Michael Doherty, Markus Elsner, et al. Toward under-  
478 standing and exploiting tumor heterogeneity. *Nature medicine*, 21(8):846, 2015.
- 479 [8] Shannon J Turley, Viviana Cremasco, and Jillian L Astarita. Immunological hallmarks of stromal cells  
480 in the tumour microenvironment. *Nature reviews immunology*, 15(11):669–682, 2015.
- 481 [9] Raghu Kalluri. The biology and function of fibroblasts in cancer. *Nature Reviews Cancer*, 16(9):582,  
482 2016.
- 483 [10] Wolf H Fridman, Laurence Zitvogel, Catherine Sautès-Fridman, and Guido Kroemer. The immune  
484 contexture in cancer prognosis and treatment. *Nature reviews Clinical oncology*, 14(12):717, 2017.
- 485 [11] Tianyi Liu, Linli Zhou, Danni Li, Thomas Andl, and Yuhang Zhang. Cancer-associated fibroblasts build  
486 and secure the tumor microenvironment. *Frontiers in cell and developmental biology*, 7:60, 2019.
- 487 [12] TL Whiteside. The tumor microenvironment and its role in promoting tumor growth. *Oncogene*,  
488 27(45):5904–5912, 2008.
- 489 [13] Frances R Balkwill, Melania Capasso, and Thorsten Hagemann. The tumor microenvironment at a  
490 glance, 2012.
- 491 [14] Yu Yan, Ruifen Wang, Wenbin Guan, Meng Qiao, and Lifeng Wang. Roles of micrnas in cancer  
492 associated fibroblasts of gastric cancer. *Pathology-Research and Practice*, 213(7):730–736, 2017.
- 493 [15] Jing Zhai, Jiajia Shen, Guiping Xie, Jiaqi Wu, Mingfang He, Lili Gao, Yifen Zhang, Xuequan Yao, and  
494 Lizong Shen. Cancer-associated fibroblasts-derived il-8 mediates resistance to cisplatin in human gastric  
495 cancer. *Cancer letters*, 454:37–43, 2019.

- 496 [16] Dachuan Zhang, Wenting He, Chao Wu, Yan Tan, Yang He, Bin Xu, Lujun Chen, Qing Li, and Jingting  
497 Jiang. Scoring system for tumor-infiltrating lymphocytes and its prognostic value for gastric cancer.  
498 *Frontiers in immunology*, 10:71, 2019.
- 499 [17] Zongxin Ling, Li Shao, Xia Liu, Yiwen Cheng, Chongxian Yan, Ying Mei, Feng Ji, and Xiaosun Liu.  
500 Regulatory t cells and plasmacytoid dendritic cells within the tumor microenvironment in gastric cancer  
501 are correlated with gastric microbiota dysbiosis: a preliminary study. *Frontiers in immunology*, 10:533,  
502 2019.
- 503 [18] Peiming Zheng, Qin Luo, Weiwei Wang, Junhua Li, Tingting Wang, Ping Wang, Lei Chen, Peng Zhang,  
504 Hui Chen, Yi Liu, et al. Tumor-associated macrophages-derived exosomes promote the migration of  
505 gastric cancer cells by transfer of functional apolipoprotein e. *Cell death & disease*, 9(4):1–14, 2018.
- 506 [19] Chunwei Peng, Jiuyang Liu, Guifang Yang, and Yan Li. The tumor-stromal ratio as a strong prog-  
507 nosticator for advanced gastric cancer patients: proposal of a new tsnm staging system. *Journal of*  
508 *gastroenterology*, 53(5):606–617, 2018.
- 509 [20] Giuseppe Sammarco, Gilda Varricchi, Valentina Ferraro, Michele Ammendola, Michele De Fazio, Do-  
510 nato Francesco Altomare, Maria Luposella, Lorenza Maltese, Giuseppe Currò, Gianni Marone, et al.  
511 Mast cells, angiogenesis and lymphangiogenesis in human gastric cancer. *International journal of molec-*  
512 *ular sciences*, 20(9):2106, 2019.
- 513 [21] Bailiang Li, Yuming Jiang, Guoxin Li, George A Fisher Jr, and Ruijiang Li. Natural killer cell and  
514 stroma abundance are independently prognostic and predict gastric cancer chemotherapy benefit. *JCI*  
515 *insight*, 5(9), 2020.
- 516 [22] Xuran Wang, Jihwan Park, Katalin Susztak, Nancy R Zhang, and Mingyao Li. Bulk tissue cell type  
517 deconvolution with multi-subject single-cell expression reference. *Nature communications*, 10(1):1–9,  
518 2019.
- 519 [23] Aaron M Newman, Chloé B Steen, Chih Long Liu, Andrew J Gentles, Aadel A Chaudhuri, Florian  
520 Scherer, Michael S Khodadoust, Mohammad S Esfahani, Bogdan A Luca, David Steiner, et al. Deter-  
521 mining cell type abundance and expression from bulk tissues with digital cytometry. *Nature biotechnol-*  
522 *ogy*, 37(7):773–782, 2019.

- 523 [24] Peng Zhang, Mingran Yang, Yiding Zhang, Shuai Xiao, Xinxing Lai, Aidi Tan, Shiyu Du, and Shao  
524 Li. Dissecting the single-cell transcriptome network underlying gastric premalignant lesions and early  
525 gastric cancer. *Cell reports*, 27(6):1934–1947, 2019.
- 526 [25] Aaron M Newman, Chih Long Liu, Michael R Green, Andrew J Gentles, Weiguo Feng, Yue Xu,  
527 Chuong D Hoang, Maximilian Diehn, and Ash A Alizadeh. Robust enumeration of cell subsets from  
528 tissue expression profiles. *Nature methods*, 12(5):453–457, 2015.
- 529 [26] John P Jakupciak, Samantha Maragh, Maura E Markowitz, Alissa K Greenberg, Mohammad O Hoque,  
530 Anirban Maitra, Peter E Barker, Paul D Wagner, William N Rom, Sudhir Srivastava, et al. Performance  
531 of mitochondrial dna mutations detecting early stage cancer. *BMC cancer*, 8(1):1–11, 2008.
- 532 [27] Meghan L Verschoor, Robert Ungard, Andrew Harbottle, John P Jakupciak, RL Parr, and Gurmit  
533 Singh. Mitochondria and cancer: past, present, and future. *BioMed research international*, 2013, 2013.
- 534 [28] Hang Yang, Yan Li, and Bing Hu. Potential role of mitochondria in gastric cancer detection: Fission  
535 and glycolysis. *Oncology Letters*, 21(6):1–7, 2021.
- 536 [29] M Constanza Camargo, Woo-Ho Kim, Anna Maria Chiaravalli, Kyoung-Mee Kim, Alejandro H Cor-  
537 valan, Keitaro Matsuo, Jun Yu, Joseph JY Sung, Roberto Herrera-Goepfert, Fernando Meneses-  
538 Gonzalez, et al. Improved survival of gastric cancer with tumour epstein–barr virus positivity: an  
539 international pooled analysis. *Gut*, 63(2):236–243, 2014.
- 540 [30] LIN Zhu, ZHI Li, YAN Wang, Chenlu Zhang, Yunpeng Liu, and Xiujuan Qu. Microsatellite instability  
541 and survival in gastric cancer: A systematic review and meta-analysis. *Molecular and clinical oncology*,  
542 3(3):699–705, 2015.
- 543 [31] Daniela F Quail and Johanna A Joyce. Microenvironmental regulation of tumor progression and metas-  
544 tasis. *Nature medicine*, 19(11):1423–1437, 2013.
- 545 [32] Pravin Mishra, Debabrata Banerjee, and Adit Ben-Baruch. Chemokines at the crossroads of tumor-  
546 fibroblast interactions that promote malignancy. *Journal of leukocyte biology*, 89(1):31–39, 2011.
- 547 [33] Akira Orimo, Piyush B Gupta, Dennis C Sgroi, Fernando Arenzana-Seisdedos, Thierry Delaunay,  
548 Rizwan Naeem, Vincent J Carey, Andrea L Richardson, and Robert A Weinberg. Stromal fibrob-  
549 lasts present in invasive human breast carcinomas promote tumor growth and angiogenesis through  
550 elevated sdf-1/cxcl12 secretion. *Cell*, 121(3):335–348, 2005.

- 551 [34] Laurie E Littlepage, Mikala Egeblad, and Zena Werb. Coevolution of cancer and stromal cellular  
552 responses. *Cancer cell*, 7(6):499–500, 2005.
- 553 [35] Niko Kemi, Maarit Eskuri, Anni Herva, Joni Leppänen, Heikki Huhta, Olli Helminen, Juha Saarnio,  
554 Tuomo J Karttunen, and Joonas H Kauppila. Tumour-stroma ratio and prognosis in gastric adenocar-  
555 cinoma. *British journal of cancer*, 119(4):435–439, 2018.
- 556 [36] Sahar MA Mahmoud, Emma Claire Paish, Desmond G Powe, R Douglas Macmillan, Matthew J Grainge,  
557 Andrew HS Lee, Ian O Ellis, and Andrew R Green. Tumor-infiltrating cd8+ lymphocytes predict clinical  
558 outcome in breast cancer. *Journal of clinical oncology*, 29(15):1949–1955, 2011.
- 559 [37] John Reiser and Arnob Banerjee. Effector, memory, and dysfunctional cd8+ t cell fates in the antitumor  
560 immune response. *Journal of immunology research*, 2016, 2016.
- 561 [38] Steven A Rosenberg. Progress in human tumour immunology and immunotherapy. *Nature*,  
562 411(6835):380–384, 2001.
- 563 [39] TA Zikos, AD Donnenberg, RJ Landreneau, JD Luketich, and VS Donnenberg. Lung t-cell subset  
564 composition at the time of surgical resection is a prognostic indicator in non-small cell lung cancer.  
565 *Cancer immunology, immunotherapy*, 60(6):819–827, 2011.
- 566 [40] Wolf Herman Fridman, Franck Pagès, Catherine Sautès-Fridman, and Jérôme Galon. The immune  
567 contexture in human tumours: impact on clinical outcome. *Nature Reviews Cancer*, 12(4):298–306,  
568 2012.
- 569 [41] John Condeelis and Jeffrey W Pollard. Macrophages: obligate partners for tumor cell migration, inva-  
570 sion, and metastasis. *Cell*, 124(2):263–266, 2006.
- 571 [42] Zhi-Ming Li, Jia-Jia Huang, Yi Xia, Jian Sun, Ying Huang, Yu Wang, Ying-Jie Zhu, Ya-Jun Li, Wei  
572 Zhao, Wen-Xiao Wei, et al. Blood lymphocyte-to-monocyte ratio identifies high-risk patients in diffuse  
573 large b-cell lymphoma treated with r-chop. *PloS one*, 7(7):e41658, 2012.
- 574 [43] M Stotz, M Pichler, G Absenger, J Szkandera, F Armingier, R Schaberl-Moser, H Samonigg, T Sto-  
575 jakovic, and A Gerger. The preoperative lymphocyte to monocyte ratio predicts clinical outcome in  
576 patients with stage iii colon cancer. *British journal of cancer*, 110(2):435–440, 2014.

- 577 [44] Dong Keun Rhee, Su Hyung Park, and Yeun Kyu Jang. Molecular signatures associated with trans-  
578 formation and progression to breast cancer in the isogenic mcf10 model. *Genomics*, 92(6):419–428,  
579 2008.
- 580 [45] Timothy R Donahue, Linh M Tran, Reginald Hill, Yunfeng Li, Anne Kovichich, Joseph H Calvopina,  
581 Sanjeet G Patel, Nanping Wu, Antreas Hindoyan, James J Farrell, et al. Integrative survival-based  
582 molecular profiling of human pancreatic cancer. *Clinical Cancer Research*, 18(5):1352–1363, 2012.
- 583 [46] Zhanlong Shen, Yingjiang Ye, Lingyi Dong, Sanna Vainionpää, Harri Mustonen, Pauli Puolakkainen,  
584 and Shan Wang. Kindlin-2: a novel adhesion protein related to tumor invasion, lymph node metastasis,  
585 and patient outcome in gastric cancer. *The American journal of surgery*, 203(2):222–229, 2012.
- 586 [47] Ting Zhao, Lizhao Guan, Yu Yu, Xuelian Pei, Jun Zhan, Ling Han, Yan Tang, Feng Li, Weigang Fang,  
587 and Hongquan Zhang. Kindlin-2 promotes genome instability in breast cancer cells. *Cancer letters*,  
588 330(2):208–216, 2013.
- 589 [48] Jung-hyun Rho, Michael HA Roehrl, and Julia Y Wang. Tissue proteomics reveals differential and  
590 compartment-specific expression of the homologs transgelin and transgelin-2 in lung adenocarcinoma  
591 and its stroma. *Journal of proteome research*, 8(12):5610–5618, 2009.
- 592 [49] H Yoshino, T Chiyomaru, H Enokida, K Kawakami, S Tatarano, K Nishiyama, N Nohata, N Seki,  
593 and M Nakagawa. The tumour-suppressive function of mir-1 and mir-133a targeting tagln2 in bladder  
594 cancer. *British journal of cancer*, 104(5):808–818, 2011.
- 595 [50] Xiang Tan and Mingwu Chen. Mylk and myl9 expression in non-small cell lung cancer identified by  
596 bioinformatics analysis of public expression data. *Tumor Biology*, 35(12):12189–12200, 2014.
- 597 [51] Jian-Hua Wang, Lan Zhang, Shu-Ting Huang, Jing Xu, Yun Zhou, Xing-Juan Yu, Rong-Zhen Luo, Zhe-  
598 Sheng Wen, Wei-Hua Jia, and Min Zheng. Expression and prognostic significance of myl9 in esophageal  
599 squamous cell carcinoma. *PLoS One*, 12(4):e0175280, 2017.
- 600 [52] Yuan Zhou, Shuhui Bian, Xin Zhou, Yueli Cui, Wendong Wang, Lu Wen, Limei Guo, Wei Fu, and  
601 Fuchou Tang. Single-cell multiomics sequencing reveals prevalent genomic alterations in tumor stromal  
602 cells of human colorectal cancer. *Cancer Cell*, 38(6):818–828, 2020.



- 603 [53] Jun-Yi Hou, Yu-Gang Wang, Shi-Jie Ma, Bing-Yin Yang, and Qian-Ping Li. Identification of a prog-  
604 nostic 5-gene expression signature for gastric cancer. *Journal of cancer research and clinical oncology*,  
605 143(4):619–629, 2017.
- 606 [54] Rika Nishikawa, Yusuke Goto, Satoko Kojima, Hideki Enokida, Takeshi Chiyomaru, Takashi Kinoshita,  
607 Shinichi Sakamoto, Miki Fuse, Masayuki Nakagawa, Yukio Naya, et al. Tumor-suppressive microRNA-29s  
608 inhibit cancer cell migration and invasion via targeting lamc1 in prostate cancer. *International journal*  
609 *of oncology*, 45(1):401–410, 2014.
- 610 [55] Moon-Chang Choi, Hyun-Soon Jong, Tai Young Kim, Sang-Hyun Song, Dong Soon Lee, Jung Weon  
611 Lee, Tae-You Kim, Noe Kyeong Kim, and Yung-Jue Bang. Akap12/gravin is inactivated by epigenetic  
612 mechanism in human gastric carcinoma and shows growth suppressor activity. *Oncogene*, 23(42):7095–  
613 7103, 2004.
- 614 [56] Irwin H Gelman. Emerging roles for ssecks/gravin/akap12 in the control of cell proliferation, cancer  
615 malignancy, and barrierogenesis. *Genes & cancer*, 1(11):1147–1156, 2010.
- 616 [57] Xudong Guo, Zhuolun Sun, Shaobo Jiang, Xunbo Jin, and Hanbo Wang. Identification and validation of  
617 a two-gene metabolic signature for survival prediction in patients with kidney renal clear cell carcinoma.  
618 *Aging (Albany NY)*, 13(6):8276, 2021.
- 619 [58] Federica Sotgia and Michael P Lisanti. Mitochondrial mrna transcripts predict overall survival, tu-  
620 mor recurrence and progression in serous ovarian cancer: companion diagnostics for cancer therapy.  
621 *Oncotarget*, 8(40):66925, 2017.
- 622 [59] Markus Bleich and Richard Warth. The very small-conductance k<sup>+</sup> channel k v lqt1 and epithelial  
623 function. *Pflügers Archiv*, 440(2):202–206, 2000.
- 624 [60] Bich LN Than, JACM Goos, Aaron L Sarver, Michael Gerard O’Sullivan, Annette Rod, Timo-  
625 thy Kaehler Starr, Remond JA Fijneman, Gerrit A Meijer, Lei Zhao, Yuanyuan Zhang, et al. The  
626 role of knq1 in mouse and human gastrointestinal cancers. *Oncogene*, 33(29):3861–3868, 2014.
- 627 [61] Raphael Rapetti-Mauss, Viviana Bustos, Warren Thomas, Jean McBryan, Harry Harvey, Natalia La-  
628 jczak, Stephen F Madden, Bernard Pellissier, Franck Borgese, Olivier Soriani, et al. Bidirectional knq1:  
629  $\beta$ -catenin interaction drives colorectal cancer cell differentiation. *Proceedings of the National Academy*  
630 *of Sciences*, 114(16):4159–4164, 2017.

- 631 [62] Sjoerd H Den Uil, Veerle MH Coupé, Janneke F Linnekamp, Evert Van Den Broek, Jeroen ACM Goos,  
632 Pien M Delis-van Diemen, J Eric, Nicole CT Van Grieken, Patricia M Scott, Louis Vermeulen, et al.  
633 Loss of *kcnq1* expression in stage ii and stage iii colon cancer is a strong prognostic factor for disease  
634 recurrence. *British journal of cancer*, 115(12):1565–1574, 2016.
- 635 [63] Bo Li and Colin N Dewey. Rsem: accurate transcript quantification from rna-seq data with or without  
636 a reference genome. *BMC bioinformatics*, 12(1):323, 2011.
- 637 [64] Gianni Monaco, Bernett Lee, Weili Xu, Seri Mustafah, You Yi Hwang, Christophe Carre, Nicolas  
638 Burdin, Lucian Visan, Michele Ceccarelli, Michael Poidinger, et al. Rna-seq signatures normalized by  
639 mrna abundance allow absolute deconvolution of human immune cell types. *Cell reports*, 26(6):1627–  
640 1640, 2019.
- 641 [65] Bo Li, Victor Ruotti, Ron M Stewart, James A Thomson, and Colin N Dewey. Rna-seq gene expression  
642 estimation with read mapping uncertainty. *Bioinformatics*, 26(4):493–500, 2010.
- 643 [66] Guangchuang Yu, Li-Gen Wang, Yanyan Han, and Qing-Yu He. clusterprofiler: an r package for  
644 comparing biological themes among gene clusters. *OmicS: a journal of integrative biology*, 16(5):284–  
645 287, 2012.
- 646 [67] Charrad Malika, Nadia Ghazzali, Veronique Boiteau, and Azam Niknafs. Nbclust: an r package for  
647 determining the relevant number of clusters in a data set. *J. Stat. Softw*, 61:1–36, 2014.

## 648 Acknowledgments

649 This work is supported by Vanderbilt University Development Funds (FF\_300033).

## 650 Competing interests

651 There is NO Competing Interest.
